# Supplementary material for: Global, regional, and national burdens and trends of migraine among males aged 10–59 years from 1990 to 2021: insights from the Global Burden of Disease study 2021
Source: Front Neurol. 2025 Jun 6;16:1585512. doi: 10.3389/fneur.2025.1585512 (PMC12178871; doi:10.3389/fneur.2025.1585512)
Supplement: Supplementary file 1 [file Table_1.XLSX]

## Sheet: TS1
Numbers and ASR per 100 000 cases of Prevalence of migraine among 10-59 Male in 1990 and 2021, along with AAPC in ASR per 100 000 cases from 1990 to 2021, categorized by global, SDI, and GBD regions.
Location	Prevalent cases		Prevalence rates
	1990(95% UI)	2021(95% UI)	1990_per 100 000(95% UI)	2021_per 100 000(95% UI)	AAPC(95% CI)
Global	246281388.64 (191897520.31 to 311672412.06)	385501430.49 (301664369.52 to 488363158.34)	13403.55 (10483.66 to 16945.59)	13943.8 (10895.83 to 17670.31)	0.12 (0.08 to 0.16)
High SDI	41884902.37 (32755936.31 to 53221288.31)	50108800.06 (39392438.81 to 63640143.58)	13300.19 (10371.74 to 16931.32)	13624.94 (10631.93 to 17358.05)	0.07 (0.04 to 0.1)
High-middle SDI	46752191.9 (36471534.87 to 59186623.63)	59397119.45 (46665588.2 to 75595723.2)	12195.76 (9525.33 to 15446.45)	12709.23 (9908.29 to 16204.43)	0.15 (0.1 to 0.19)
Middle SDI	80525544.47 (62860355.09 to 101876972.53)	125190548.19 (98325236.77 to 158606172.94)	13165.76 (10328.83 to 16635.6)	14121.9 (11061.48 to 17902.32)	0.23 (0.19 to 0.27)
Low-middle SDI	57112291.39 (44413824.17 to 72690225.88)	103222514.32 (80411176.67 to 130883498.28)	15144.5 (11854.27 to 19216.69)	15090.72 (11783.46 to 19122.42)	0 (-0.03 to 0.03)
Low SDI	19778792.16 (15221511.89 to 25386557.29)	47286519.84 (36315820.49 to 60727169.72)	13291 (10328.18 to 16981.84)	13208.42 (10240.74 to 16882.58)	-0.01 (-0.03 to 0)
Andean Latin America	1079819.06 (824798.66 to 1400683.57)	2153770.66 (1636067.84 to 2800517.46)	8531.58 (6567.01 to 11008.45)	9152.52 (6956.62 to 11900.05)	0.23 (0.17 to 0.29)
Australasia	981637.55 (750438.28 to 1273305.05)	1388830.57 (1066378.24 to 1799480.54)	13580.56 (10361.75 to 17643.54)	13584.46 (10366.56 to 17644.88)	0 (0 to 0)
Caribbean	1561946.95 (1181412.43 to 2043485.28)	2120110.67 (1611431.89 to 2765782.26)	12947.22 (9826.37 to 16907.84)	12947.22 (9826.37 to 16907.84)	0 (0 to 0)
Central Asia	2791832.69 (2082211.21 to 3685239.56)	4176781.79 (3140931.59 to 5492793.69)	12488.33 (9379.69 to 16431.67)	12488.33 (9379.69 to 16431.67)	0 (0 to 0)
Central Europe	5391569.49 (4160817.61 to 6959479.11)	4783019.88 (3719192 to 6148322.76)	12340.37 (9505.02 to 15946.76)	12359.95 (9537.21 to 15949.55)	0.01 (0 to 0.01)
Central Latin America	6392646.01 (4940463.14 to 8189069.49)	10551402.5 (8173022.17 to 13559302.4)	11655.95 (9074.15 to 14871.8)	11962.64 (9264.85 to 15375.83)	0.09 (0.08 to 0.09)
Central Sub-Saharan Africa	2079548.95 (1541951.57 to 2734873.86)	5620771.82 (4175707.35 to 7385844.6)	12901.57 (9702.6 to 16846.98)	12901.57 (9702.6 to 16846.98)	0 (0 to 0)
East Asia	48383877.14 (37722463.46 to 61385022)	61757080.96 (48489672.88 to 78803035.43)	10506.17 (8212.98 to 13323.71)	11425.74 (8907.67 to 14599.99)	0.29 (0.2 to 0.38)
Eastern Europe	9539448.34 (7514062.85 to 12044430.57)	8510009.55 (6725592.8 to 10735515.2)	12339.55 (9690.42 to 15595.08)	12384.16 (9723.92 to 15646.59)	0 (-0.05 to 0.05)
Eastern Sub-Saharan Africa	4834083.59 (3682983.57 to 6239469.76)	12106266.36 (9257043.11 to 15608801.55)	8935.95 (6895.33 to 11459.83)	9019.28 (6975.75 to 11566.8)	0.03 (0.02 to 0.04)
High-income Asia Pacific	6086286.28 (4750308.83 to 7742473.24)	5806171.19 (4570647.62 to 7358908.33)	9509.45 (7400.72 to 12122.29)	9924.75 (7728.12 to 12649.83)	0.14 (0.11 to 0.16)
High-income North America	13852961.91 (10857593.31 to 17559756.14)	16600764.36 (13060916.71 to 21107102.06)	14008.27 (10952.55 to 17802.36)	13772.14 (10790.6 to 17541.24)	-0.07 (-0.13 to -0.01)
North Africa and Middle East	16705531.38 (12689665.32 to 21559126.05)	34404187.36 (26544644.54 to 44068092.65)	14646.72 (11234.69 to 18824.95)	14705.17 (11335.59 to 18842.38)	0 (-0.01 to 0.02)
Oceania	320181.91 (240291.55 to 421943.82)	709047.83 (534377.19 to 931942.71)	14679.37 (11114.63 to 19237.1)	14679.37 (11114.63 to 19237.1)	0 (0 to 0)
South Asia	57196454.46 (44460630.25 to 72414016.25)	106556540.75 (83417806.55 to 135262945.82)	15539.55 (12147.97 to 19632.13)	15594.94 (12225.84 to 19796.28)	0.02 (-0.04 to 0.08)
Southeast Asia	25714519.08 (19677023.08 to 33153484.59)	42700005.69 (33002711.3 to 54798767.02)	16642.82 (12820.87 to 21398.8)	16641.38 (12842.55 to 21370.41)	0 (0 to 0)
Southern Latin America	1710857.03 (1307260.91 to 2221769.78)	2536536.02 (1929032.86 to 3295038.24)	10423.28 (7984.87 to 13520.74)	10740.4 (8144.62 to 13978.97)	0.1 (0.09 to 0.1)
Southern Sub-Saharan Africa	2192694.07 (1689688.57 to 2803378.06)	3790790.38 (2941256.69 to 4828820.99)	13390.65 (10402.2 to 17047.9)	13392.6 (10405.37 to 17051.01)	0 (0 to 0)
Tropical Latin America	8986573.7 (7025303.7 to 11400284.59)	13596113.05 (10679480.28 to 17196043.48)	16681.37 (13091.02 to 21139.54)	17368.65 (13621.37 to 21986.76)	0.14 (0.08 to 0.2)
Western Europe	21464745.59 (16584699.31 to 27531394.14)	22571837.66 (17503809.67 to 29000894.74)	16053.49 (12354.04 to 20641.65)	16230.72 (12487.87 to 20912.9)	0.04 (0 to 0.09)
Western Sub-Saharan Africa	9014173.45 (6925578.11 to 11657289.93)	23061391.43 (17680821.34 to 29879328.07)	15733.93 (12188.15 to 20264.19)	15615.54 (12092.49 to 20144.67)	-0.02 (-0.03 to -0.02)

## Sheet: TS2
Numbers and ASR per 100 000 cases of DALYs of migraine among 10-59 Male in 1990 and 2021, along with AAPC in ASR per 100 000 cases from 1990 to 2021, categorized by global, SDI, and GBD regions.
Location	DALYs cases		DALYs rates
	1990(95% UI)	2021(95% UI)	1990_per 100 000(95% UI)	2021_per 100 000(95% UI)	AAPC(95% CI)
Global	9335098.86 (1340152.77 to 21382278.4)	14653782.98 (2140199.99 to 33543835.61)	510 (77.17 to 1159.96)	529.37 (75.85 to 1214.98)	0.11 (0.07 to 0.16)
High SDI	1593571.99 (266503.1 to 3625325.17)	1919207.64 (341027.2 to 4322493.2)	505.01 (82.5 to 1153.41)	516.79 (83.34 to 1179.9)	0.07 (0.03 to 0.1)
High-middle SDI	1819986.55 (331230.07 to 4109516.31)	2327490.96 (437910.11 to 5153804.04)	475.83 (88.21 to 1070.62)	493.96 (85.08 to 1109.54)	0.13 (0.09 to 0.17)
Middle SDI	3065628.45 (416554.15 to 7058484.83)	4780883.93 (687828.75 to 10925351.61)	503.39 (73.38 to 1148.08)	538.08 (74.42 to 1237.02)	0.22 (0.18 to 0.26)
Low-middle SDI	2113614.64 (234615.12 to 4946605.28)	3846032.17 (445478.74 to 8961472.54)	562.3 (68.42 to 1302.82)	563.01 (67.78 to 1306.56)	0 (-0.04 to 0.03)
Low SDI	733602.65 (93647.47 to 1702577.06)	1768782.37 (223796.07 to 4118431.16)	495.8 (70.2 to 1135.64)	496.54 (69.61 to 1142.23)	0 (-0.03 to 0.04)
Andean Latin America	41525.13 (6943.57 to 97052.35)	83297.04 (14767.54 to 193425.24)	332.82 (63 to 764.52)	354.67 (64.06 to 821.24)	0.21 (0.14 to 0.28)
Australasia	36611.63 (6028.78 to 85772.1)	52267.86 (8587.61 to 119751.4)	506.03 (82.42 to 1187.99)	507.92 (78.23 to 1177.19)	0.01 (0.01 to 0.02)
Caribbean	58844.44 (6963.42 to 138621.19)	80248.03 (10686.34 to 185651.45)	490.17 (63.51 to 1144.56)	489.45 (63.49 to 1135.66)	0 (-0.01 to 0)
Central Asia	105634.84 (16104.33 to 246390.79)	159598.87 (26258.17 to 364785.43)	476.1 (78.43 to 1097.51)	477.35 (78.32 to 1092.31)	0.01 (0 to 0.01)
Central Europe	210897.37 (42327.67 to 474363.73)	189878.3 (41441.98 to 419010.63)	481.45 (94.27 to 1088.86)	484.53 (95.71 to 1092.92)	0.02 (0.01 to 0.03)
Central Latin America	242389.43 (31286.18 to 558917.96)	403522.51 (58205.3 to 928629.11)	445.85 (66.45 to 1010.57)	457.44 (65.94 to 1052.82)	0.09 (0.08 to 0.1)
Central Sub-Saharan Africa	76835.43 (10232.27 to 177644.3)	210334.03 (28867 to 486443.08)	480.75 (72.04 to 1095.65)	485.99 (74.02 to 1106.87)	0.04 (0.03 to 0.05)
East Asia	1885908.22 (328309.1 to 4290107.89)	2417325.42 (441351.49 to 5380459.15)	411.01 (74.13 to 928.57)	443.78 (74.33 to 1003.64)	0.26 (0.18 to 0.34)
Eastern Europe	386651.04 (97288.75 to 850556.04)	350496.67 (93642.83 to 758012.33)	498.22 (121.88 to 1102.74)	501.93 (122.96 to 1109.52)	0.02 (-0.01 to 0.05)
Eastern Sub-Saharan Africa	184339.73 (32804.76 to 425086.19)	463184.39 (80168.18 to 1069927.07)	345.2 (68.34 to 779.96)	348.69 (66.85 to 789.37)	0.04 (0.03 to 0.05)
High-income Asia Pacific	245481.88 (58260.84 to 556702.03)	237099.39 (58766.36 to 527249.66)	380.54 (87.12 to 870.27)	394.68 (86.54 to 905.37)	0.11 (0.09 to 0.13)
High-income North America	524155.63 (84273.89 to 1182211.37)	628425.86 (108387.64 to 1409050.49)	529.86 (84.56 to 1199.22)	517.72 (83.35 to 1171.51)	-0.09 (-0.14 to -0.03)
North Africa and Middle East	668031.83 (103418.45 to 1538903.94)	1385636.96 (243972.61 to 3121764.72)	590.02 (102.7 to 1334.09)	591.94 (103.57 to 1335.75)	0.01 (-0.01 to 0.02)
Oceania	11927.86 (1289.37 to 27976.27)	26543.98 (3000.71 to 61930.39)	549.28 (65.57 to 1273.92)	550.68 (65.56 to 1276.89)	0.01 (0 to 0.02)
South Asia	2083587.96 (214036.67 to 4846895.38)	3898934.63 (406698.98 to 9066181.87)	567.51 (62.97 to 1312.06)	571.08 (61.37 to 1324.97)	0.04 (-0.04 to 0.11)
Southeast Asia	965274.89 (98248.01 to 2259273.23)	1619035.52 (183743.19 to 3742095.52)	626.9 (69.66 to 1454.33)	630.53 (70.31 to 1460.39)	0.02 (0.01 to 0.02)
Southern Latin America	66180.14 (12457.17 to 151177.11)	98347.99 (18982.27 to 223625.75)	404.53 (78.05 to 919.59)	415.09 (78.12 to 948.06)	0.09 (0.06 to 0.11)
Southern Sub-Saharan Africa	82390.49 (11871.53 to 189965.86)	142034.98 (21857.82 to 322260.05)	506.83 (80.98 to 1149.65)	502.99 (80.15 to 1136.99)	-0.02 (-0.03 to -0.02)
Tropical Latin America	333537.33 (28508.54 to 794120.84)	506285.44 (50033.2 to 1184213.2)	620.34 (60.26 to 1459.73)	646.25 (59.82 to 1520.57)	0.15 (0.08 to 0.23)
Western Europe	789244.12 (97319.7 to 1853862.31)	835363.25 (111505.7 to 1944288.24)	589.01 (69.38 to 1390.6)	595.91 (70.41 to 1405.26)	0.05 (0 to 0.1)
Western Sub-Saharan Africa	335649.46 (40452.48 to 786475.8)	865921.87 (102016.24 to 2035961.29)	589.46 (78.48 to 1364.64)	590.58 (78.83 to 1367.49)	0.01 (-0.01 to 0.03)

## Sheet: TS3
Numbers and ASR per 100 000 cases of Prevalence of migraine among 10-59 Male in 1990 and 2021, along with AAPC in ASR per 100 000 cases from 1990 to 2021, categorized by 204 countries.
Location	Prevalent cases		Prevalence rates
	1990(95% UI)	2021(95% UI)	1990_per 100 000(95% UI)	2021_per 100 000(95% UI)	AAPC(95% CI)
Afghanistan	410896 (540078.04 to 304524.71)	1529923.5 (2000749.17 to 1135397.8)	14652.1 (19046.8 to 11028.21)	14652.1 (19046.8 to 11028.21)	0 (0 to 0)
Albania	141563.75 (184860.68 to 106298.89)	111027.78 (144229.55 to 84094.94)	12137.66 (15819.94 to 9150.14)	12137.66 (15819.94 to 9150.14)	0 (0 to 0)
Algeria	1221767.46 (1596632.4 to 906976.82)	2266730.07 (2944958.53 to 1710071.67)	14652.1 (19046.8 to 11028.21)	14652.1 (19046.8 to 11028.21)	0 (0 to 0)
American Samoa	2392.71 (3149.48 to 1798.75)	2604.68 (3415.97 to 1968.88)	14679.37 (19237.1 to 11114.63)	14679.37 (19237.1 to 11114.63)	0 (0 to 0)
Andorra	3576.15 (4686.6 to 2708.9)	4920.44 (6427.06 to 3746.67)	15718.66 (20651.57 to 11838.73)	15718.66 (20651.57 to 11838.73)	0 (0 to 0)
Angola	405756.03 (533105.46 to 301508.32)	1220199.29 (1605710.59 to 904425.12)	12901.57 (16846.98 to 9702.6)	12901.57 (16846.98 to 9702.6)	0 (0 to 0)
Antigua and Barbuda	2620.66 (3428.59 to 1982.49)	4114.52 (5358.61 to 3135.33)	12947.22 (16907.84 to 9826.37)	12947.22 (16907.84 to 9826.37)	0 (0 to 0)
Argenti0	1165769.55 (1522423.23 to 888934.79)	1761879.33 (2292151.28 to 1333751.43)	10774.49 (14055.43 to 8235.7)	11130.22 (14500.45 to 8409.32)	0.11 (0.11 to 0.11)
Armenia	144179.59 (189870.03 to 108020.82)	124711.95 (163670.12 to 94180.06)	12488.33 (16431.67 to 9379.69)	12488.33 (16431.67 to 9379.69)	0 (0 to 0)
Australia	812737.79 (1062936.4 to 615490.45)	1142131.18 (1491760.94 to 868270.91)	13480.04 (17662.5 to 10183.45)	13480.04 (17662.5 to 10183.45)	0 (0 to 0)
Austria	402972.46 (523242.25 to 305900.89)	438739.85 (569273.88 to 335786.1)	14738.52 (19216.75 to 11136.56)	14728.26 (19213.37 to 11155.18)	0 (-0.02 to 0.01)
Azerbaijan	304179.69 (401203.36 to 227015.2)	491550.39 (645336.17 to 370839.88)	12488.33 (16431.67 to 9379.69)	12488.33 (16431.67 to 9379.69)	0 (0 to 0)
Bahamas	12012.14 (15718.88 to 9083.96)	18232.6 (23785.96 to 13859.63)	12947.22 (16907.84 to 9826.37)	12947.22 (16907.84 to 9826.37)	0 (0 to 0)
Bahrain	33632.89 (43490.88 to 25389.67)	119052.48 (153900.65 to 90653.37)	14652.1 (19046.8 to 11028.21)	14652.1 (19046.8 to 11028.21)	0 (0 to 0)
Bangladesh	5264268.79 (6939450.46 to 3943302.65)	8774478.86 (11508027.36 to 6624917.67)	15458.69 (20258.62 to 11689.67)	15458.69 (20258.62 to 11689.67)	0 (0 to 0)
Barbados	11236.6 (14676.77 to 8517.51)	12480.26 (16248.06 to 9515.56)	12947.22 (16907.84 to 9826.37)	12947.22 (16907.84 to 9826.37)	0 (0 to 0)
Belarus	385686.86 (501777.21 to 294990.25)	337772.87 (438030.11 to 260070.49)	10939.71 (14260.84 to 8336.65)	10939.71 (14260.84 to 8336.65)	0 (0 to 0)
Belgium	631014.83 (817393.09 to 480369.58)	694180.16 (903933.34 to 525926.45)	18189.06 (23632.89 to 13767.35)	18970.49 (24793.7 to 14277.75)	0.14 (0.14 to 0.14)
Belize	7838.49 (10300.09 to 5894.6)	20323.97 (26570.35 to 15389.47)	12947.22 (16907.84 to 9826.37)	12947.22 (16907.84 to 9826.37)	0 (0 to 0)
Benin	193253.71 (257701.84 to 143853.61)	620592.6 (825562.42 to 462877.67)	15302.52 (20208.52 to 11569.14)	15302.52 (20208.52 to 11569.14)	0 (0 to 0)
Bermuda	2790.96 (3632 to 2128.07)	2512.76 (3264.94 to 1922.68)	12947.22 (16907.84 to 9826.37)	12947.22 (16907.84 to 9826.37)	0 (0 to 0)
Bhutan	34313.55 (45277.26 to 25618.6)	46299.05 (60579.57 to 35061.51)	15458.69 (20258.62 to 11689.67)	15458.69 (20258.62 to 11689.67)	0 (0 to 0)
Bolivia (Pluri0tio0l State of)	191116.78 (252547.87 to 143046.5)	395169.84 (518277.13 to 298039.18)	9411.73 (12336.47 to 7108.85)	9411.73 (12336.47 to 7108.85)	0 (0 to 0)
Bosnia and Herzegovi0	204700.44 (266444.74 to 154504.55)	134315.76 (174225.37 to 102133.65)	12137.66 (15819.94 to 9150.14)	12137.66 (15819.94 to 9150.14)	0 (0 to 0)
Botswa0	48896.46 (64390.53 to 36173.63)	113963.35 (148848.45 to 85645.26)	12901.57 (16846.98 to 9702.6)	12901.57 (16846.98 to 9702.6)	0 (0 to 0)
Brazil	8767142.58 (11116288.48 to 6855283.05)	13170221.75 (16648565.16 to 10351811.07)	16695 (21147.53 to 13104.31)	17412.25 (22028.75 to 13665.2)	0.15 (0.08 to 0.21)
Brunei Darussalam	9616.62 (12621.2 to 7268.7)	18270.42 (23840.74 to 13941.8)	9529.32 (12482.53 to 7234.89)	9529.32 (12482.53 to 7234.89)	0 (0 to 0)
Bulgaria	361520.96 (470096.98 to 273712.63)	270054.57 (350134.46 to 205600.21)	12137.66 (15819.94 to 9150.14)	12137.66 (15819.94 to 9150.14)	0 (0 to 0)
Burki0 Faso	380354.24 (507250.04 to 282888.37)	1002109.83 (1333310.32 to 747686.45)	15302.52 (20208.52 to 11569.14)	15302.52 (20208.52 to 11569.14)	0 (0 to 0)
Burundi	140890.42 (184695.18 to 105073.46)	376397.25 (492955.22 to 281164.44)	9096.25 (11840.29 to 6861.86)	9096.25 (11840.29 to 6861.86)	0 (0 to 0)
Cabo Verde	14409.87 (19206.92 to 10677.5)	33039.14 (43629.19 to 24986.93)	15302.52 (20208.52 to 11569.14)	15302.52 (20208.52 to 11569.14)	0 (0 to 0)
Cambodia	456631.36 (603009.23 to 341100.53)	974983.28 (1281942.95 to 735486.5)	16217.84 (21305.42 to 12249.83)	16217.84 (21305.42 to 12249.83)	0 (0 to 0)
Cameroon	453850.18 (603888.12 to 338583.5)	1558413.79 (2071608.61 to 1164345.96)	15302.52 (20208.52 to 11569.14)	15302.52 (20208.52 to 11569.14)	0 (0 to 0)
Ca0da	1173560.96 (1519577.26 to 902116.18)	1429996.47 (1871208.67 to 1092874)	11907.26 (15458.92 to 9113.92)	11929.09 (15676.1 to 9048.63)	0.01 (0.01 to 0.01)
Central African Republic	103796.09 (136412.15 to 77086.04)	222875.19 (292726.57 to 165683.96)	12901.57 (16846.98 to 9702.6)	12901.57 (16846.98 to 9702.6)	0 (0 to 0)
Chad	245228.67 (326532.24 to 182647.19)	750916.34 (1001059.39 to 557928.51)	15302.52 (20208.52 to 11569.14)	15302.52 (20208.52 to 11569.14)	0 (0 to 0)
Chile	438175.67 (569329.57 to 331122.24)	656851.32 (857753.87 to 500705.8)	9579.49 (12430.3 to 7268.22)	9853.29 (12898.19 to 7478.57)	0.09 (0.09 to 0.09)
Chi0	46735603.54 (59286407.39 to 36420677.98)	59562419.14 (75985514.1 to 46766044.47)	10480.79 (13291.17 to 8189.57)	11411.44 (14579.36 to 8897.82)	0.29 (0.21 to 0.38)
Colombia	1307292.22 (1707030.88 to 996986.37)	2096647.87 (2746188.54 to 1593029.13)	11691.57 (15222.39 to 8959.13)	12026.91 (15785.55 to 9110.9)	0.09 (0.09 to 0.09)
Comoros	12210.33 (16010.39 to 9085.08)	23798.27 (31043.65 to 17883.41)	9096.25 (11840.29 to 6861.86)	9096.25 (11840.29 to 6861.86)	0 (0 to 0)
Congo	93315.91 (122788.8 to 69098.32)	240616.99 (315157.24 to 179910.14)	12901.57 (16846.98 to 9702.6)	12901.57 (16846.98 to 9702.6)	0 (0 to 0)
Cook Islands	968.82 (1273.93 to 729.15)	829.45 (1086.27 to 629.15)	14679.37 (19237.1 to 11114.63)	14679.37 (19237.1 to 11114.63)	0 (0 to 0)
Costa Rica	121883.35 (160583.35 to 91770.46)	192223.19 (251854.75 to 145985.18)	11754.96 (15437.15 to 8901.14)	11754.96 (15437.15 to 8901.14)	0 (0 to 0)
Coted'Ivoire	579672.16 (770498.92 to 433141.84)	1438981.39 (1909606 to 1078842.79)	15302.52 (20208.52 to 11569.14)	15302.52 (20208.52 to 11569.14)	0 (0 to 0)
Croatia	213135.96 (276985.94 to 161448.15)	165270.94 (215814.06 to 126994.35)	12137.66 (15819.94 to 9150.14)	12060.21 (15824.34 to 9171.31)	0.02 (-0.11 to 0.14)
Cuba	520896.96 (679308.89 to 395557.2)	489237.81 (636491.33 to 373656.04)	12947.22 (16907.84 to 9826.37)	12947.22 (16907.84 to 9826.37)	0 (0 to 0)
Cyprus	43419.49 (57030.71 to 32727.02)	74421.63 (97381.44 to 56550.34)	15718.66 (20651.57 to 11838.73)	15718.66 (20651.57 to 11838.73)	0 (0 to 0)
Czechia	437357.16 (569338.94 to 330503.51)	427591.94 (554666.27 to 325419.84)	12137.66 (15819.94 to 9150.14)	12137.66 (15819.94 to 9150.14)	0 (0 to 0)
Democratic People's Republic of Korea	780805.54 (1023159.65 to 586983.87)	1155576.33 (1510191.33 to 874317.87)	11300.25 (14807.48 to 8491.38)	11300.25 (14807.48 to 8491.38)	0 (0 to 0)
Democratic Republic of the Congo	1423035.6 (1872085.5 to 1054400.46)	3786940.66 (4975147.83 to 2814019.51)	12901.57 (16846.98 to 9702.6)	12901.57 (16846.98 to 9702.6)	0 (0 to 0)
Denmark	245501.65 (319078.9 to 187389.91)	259642.36 (340615.97 to 197805.6)	13433.9 (17524.47 to 10188.93)	13799.99 (18148.56 to 10423.35)	0.09 (0.08 to 0.09)
Djibouti	12994.88 (17021.82 to 9688.67)	44479.16 (58009.69 to 33467.17)	9096.25 (11840.29 to 6861.86)	9096.25 (11840.29 to 6861.86)	0 (0 to 0)
Dominica	3198.19 (4191.58 to 2412.66)	3176.42 (4142.4 to 2415.4)	12947.22 (16907.84 to 9826.37)	12947.22 (16907.84 to 9826.37)	0 (0 to 0)
Dominican Republic	308828.06 (404876.51 to 232898.04)	512514.19 (668762.94 to 389280.26)	12947.22 (16907.84 to 9826.37)	12947.22 (16907.84 to 9826.37)	0 (0 to 0)
Ecuador	353943.57 (466749.83 to 265694.26)	692659.84 (915466.05 to 521684.14)	10510.4 (13796.03 to 7941.62)	10937.17 (14443.62 to 8246.37)	0.13 (0.11 to 0.15)
Egypt	2793024.02 (3652061.61 to 2101955.33)	5560150.47 (7039710.21 to 4312960.1)	14749.58 (19224.77 to 11181.13)	14669.95 (18548.69 to 11409.31)	-0.02 (-0.02 to -0.02)
El Salvador	199889.89 (264491.97 to 149701.24)	245482.56 (322834.76 to 185306.48)	11754.96 (15437.15 to 8901.14)	11754.96 (15437.15 to 8901.14)	0 (0 to 0)
Equatorial Guinea	14627.96 (19248.8 to 10837.25)	73808.77 (97105.74 to 54634.52)	12901.57 (16846.98 to 9702.6)	12901.57 (16846.98 to 9702.6)	0 (0 to 0)
Eritrea	92089.77 (120783.7 to 68512.53)	208589.68 (272697.19 to 156201.02)	9096.25 (11840.29 to 6861.86)	9096.25 (11840.29 to 6861.86)	0 (0 to 0)
Estonia	57937.14 (75342.1 to 44326.29)	46664.8 (60540.17 to 35911.93)	10939.71 (14260.84 to 8336.65)	10939.71 (14260.84 to 8336.65)	0 (0 to 0)
Eswatini	28399.76 (37436.08 to 20972.93)	50741.01 (66548.62 to 37820.89)	12901.57 (16846.98 to 9702.6)	12901.57 (16846.98 to 9702.6)	0 (0 to 0)
Ethiopia	1189068.02 (1519804 to 917686.93)	2994366.28 (3812594.92 to 2323325.83)	8414.65 (10696.09 to 6560.01)	8473.3 (10750.67 to 6637.96)	0.02 (0.02 to 0.03)
Fiji	38710.7 (50939.73 to 29122.35)	48513.2 (63568.57 to 36738.52)	14679.37 (19237.1 to 11114.63)	14679.37 (19237.1 to 11114.63)	0 (0 to 0)
Finland	279685.72 (366272.29 to 211971.37)	270251.24 (353808.54 to 204944.33)	15718.66 (20651.57 to 11838.73)	15718.66 (20651.57 to 11838.73)	0 (0 to 0)
France	3280990.95 (4295373.61 to 2478334.64)	3321319.89 (4346953.7 to 2541507.11)	16499.89 (21665.49 to 12416.32)	16272.33 (21343.05 to 12390.09)	-0.04 (-0.11 to 0.03)
Gabon	39017.36 (51233.14 to 29021.18)	76330.92 (99996.63 to 57034.08)	12901.57 (16846.98 to 9702.6)	12901.57 (16846.98 to 9702.6)	0 (0 to 0)
Gambia	44749.22 (59514.88 to 33396.87)	116602.5 (154996.63 to 87025.12)	15302.52 (20208.52 to 11569.14)	15302.52 (20208.52 to 11569.14)	0 (0 to 0)
Georgia	230408.37 (302915.02 to 173242.67)	145575.66 (190931.48 to 110079.84)	12488.33 (16431.67 to 9379.69)	12488.33 (16431.67 to 9379.69)	0 (0 to 0.01)
Germany	4647463 (6048894.82 to 3540412.23)	4614963.21 (5996432.39 to 3505822.14)	16335.67 (21341.32 to 12346.65)	16883.57 (22076.95 to 12705.03)	0.09 (0.01 to 0.16)
Gha0	688355.74 (915322.31 to 513930.67)	1704056.55 (2260951.44 to 1277099.98)	15302.52 (20208.52 to 11569.14)	15302.52 (20208.52 to 11569.14)	0 (0 to 0)
Greece	597555.09 (784952.67 to 450786)	524965.7 (685554.6 to 398885.24)	16800.45 (22111.1 to 12637.77)	16675.59 (21868.47 to 12569.93)	-0.02 (-0.02 to -0.02)
Greenland	3065.49 (3997.45 to 2330.5)	2591.96 (3378.07 to 1981.29)	12693.35 (16608.71 to 9617.42)	12693.35 (16608.71 to 9617.42)	0 (0 to 0)
Gre0da	3547.71 (4655.76 to 2672.22)	5001.54 (6520.82 to 3805.91)	12947.22 (16907.84 to 9826.37)	12947.22 (16907.84 to 9826.37)	0 (0 to 0)
Guam	7956.25 (10439.04 to 6012.08)	8099.25 (10603.7 to 6145.98)	14679.37 (19237.1 to 11114.63)	14679.37 (19237.1 to 11114.63)	0 (0 to 0)
Guatemala	292767.25 (388072.5 to 218876.43)	639137 (841504.6 to 481616.63)	11754.96 (15437.15 to 8901.14)	11754.96 (15437.15 to 8901.14)	0 (0 to 0)
Guinea	247426.82 (328965.77 to 185045.88)	591111.64 (787088.97 to 440389.74)	15302.52 (20208.52 to 11569.14)	15302.52 (20208.52 to 11569.14)	0 (0 to 0)
Guinea-Bissau	42764.47 (56984.12 to 31812.67)	97147.93 (129240.77 to 72461.97)	15302.52 (20208.52 to 11569.14)	15302.52 (20208.52 to 11569.14)	0 (0 to 0)
Guya0	34700.96 (45482.1 to 26175.53)	34698.51 (45322.77 to 26325.65)	12947.22 (16907.84 to 9826.37)	12947.22 (16907.84 to 9826.37)	0 (0 to 0)
Haiti	254158.82 (333491.3 to 191550.83)	575719.9 (753168.24 to 435604.72)	12947.22 (16907.84 to 9826.37)	12947.22 (16907.84 to 9826.37)	0 (0 to 0)
Honduras	169981.8 (225325.08 to 127056.02)	411153.52 (541587.51 to 309652.85)	11754.96 (15437.15 to 8901.14)	11754.96 (15437.15 to 8901.14)	0 (0 to 0)
Hungary	433763.39 (564622.86 to 327885.54)	382731.94 (496360.34 to 291208.52)	12137.66 (15819.94 to 9150.14)	12137.66 (15819.94 to 9150.14)	0 (0 to 0)
Iceland	14098.64 (18513.92 to 10626.04)	18704.94 (24515.42 to 14162.62)	15718.66 (20651.57 to 11838.73)	15718.66 (20651.57 to 11838.73)	0 (0 to 0)
India	45302233.95 (57346956.3 to 35314146.51)	83054321.59 (105447016.07 to 64973183.21)	15471.41 (19548.56 to 12116.11)	15548.86 (19746.46 to 12176.42)	0.03 (-0.05 to 0.12)
Indonesia	10491772.97 (13455656.04 to 8079354.93)	17945281.31 (22926158.53 to 13929525.52)	16900.61 (21617.89 to 13093.8)	16900.61 (21617.89 to 13093.8)	0 (0 to 0)
Iran (Islamic Republic of)	2866093.15 (3627596.89 to 2233303.08)	5046434.76 (6360029.26 to 3977983.19)	15786.34 (19908.3 to 12408.74)	15659.13 (19773.08 to 12298.42)	-0.05 (-0.06 to -0.04)
Iraq	893221.47 (1167517.67 to 663285.32)	2287257.89 (2977652.6 to 1714507.06)	14652.1 (19046.8 to 11028.21)	14652.1 (19046.8 to 11028.21)	0 (0 to 0)
Ireland	192637.12 (253309.61 to 144721.29)	255877.93 (335294.9 to 193600.43)	15718.66 (20651.57 to 11838.73)	15718.66 (20651.57 to 11838.73)	0 (0 to 0)
Israel	256245.6 (337178 to 192249.82)	490144.59 (643847.93 to 369185.75)	15718.66 (20651.57 to 11838.73)	15718.66 (20651.57 to 11838.73)	0 (0 to 0)
Italy	3371622.12 (4282115.98 to 2636581.06)	3195843.49 (4065277.07 to 2513068.41)	17007.32 (21635.64 to 13263.52)	17138.26 (21799.92 to 13389.11)	0.01 (-0.19 to 0.21)
Jamaica	101266.09 (132787.39 to 76356.18)	132400.87 (172666.74 to 100654.35)	12947.22 (16907.84 to 9826.37)	12947.22 (16907.84 to 9826.37)	0 (0 to 0)
Japan	4021840.54 (5084433.35 to 3172749.12)	3601513.21 (4541457.03 to 2834920.21)	8848.39 (11215.89 to 6952.42)	9531.49 (12083.3 to 7435.41)	0.24 (0.24 to 0.24)
Jordan	192340.76 (251281.22 to 142588.45)	735978.28 (956947.13 to 552842.3)	14652.1 (19046.8 to 11028.21)	14652.1 (19046.8 to 11028.21)	0 (0 to 0)
Kazakhstan	693495.79 (913922.03 to 519117.53)	800833.49 (1052966.04 to 602975.13)	12488.33 (16431.67 to 9379.69)	12488.33 (16431.67 to 9379.69)	0 (0 to 0)
Kenya	633689.23 (805406.88 to 487859.44)	1625384.14 (2062473.39 to 1255873.03)	9673.94 (12252.35 to 7518.16)	9673.94 (12252.35 to 7518.16)	0 (0 to 0)
Kiribati	3466.33 (4564.89 to 2604.61)	5954.48 (7828.44 to 4487.06)	14679.37 (19237.1 to 11114.63)	14679.37 (19237.1 to 11114.63)	0 (0 to 0)
Kuwait	115511.59 (149375.07 to 87893)	300021.25 (392301.53 to 229730.85)	15163.1 (19655.24 to 11477.77)	14993.07 (19731.67 to 11368.48)	-0.04 (-0.04 to -0.04)
Kyrgyzstan	176037.87 (232541.7 to 131136.71)	290298.24 (382527.46 to 217468.07)	12488.33 (16431.67 to 9379.69)	12488.33 (16431.67 to 9379.69)	0 (0 to 0)
Lao People's Democratic Republic	196519.12 (259386.18 to 147085.76)	430996.66 (566552.23 to 325041.45)	16217.84 (21305.42 to 12249.83)	16217.84 (21305.42 to 12249.83)	0 (0 to 0)
Latvia	97562.18 (126804.48 to 74690.38)	64210.83 (83246.94 to 49445.69)	10939.71 (14260.84 to 8336.65)	10939.71 (14260.84 to 8336.65)	0 (0 to 0)
Lebanon	142698.26 (186082.33 to 106617.53)	294295.89 (381549.97 to 222148.44)	14652.1 (19046.8 to 11028.21)	14652.1 (19046.8 to 11028.21)	0 (0 to 0)
Lesotho	51078.58 (67281.4 to 37814.92)	83197.71 (109073.11 to 62027.67)	12901.57 (16846.98 to 9702.6)	12901.57 (16846.98 to 9702.6)	0 (0 to 0)
Liberia	109545.79 (145611.67 to 81911.73)	285570.18 (379073.95 to 214022.99)	15302.52 (20208.52 to 11569.14)	15302.52 (20208.52 to 11569.14)	0 (0 to 0)
Libya	217628.16 (284377.54 to 161903.71)	409971.57 (531878.16 to 310339.64)	14652.1 (19046.8 to 11028.21)	14652.1 (19046.8 to 11028.21)	0 (0 to 0)
Lithuania	120886.04 (157211.6 to 91952.18)	83589.31 (108134.49 to 63973.05)	9675.42 (12610.58 to 7344.74)	9675.42 (12610.58 to 7344.74)	-0.03 (-0.04 to -0.02)
Luxembourg	21540.98 (28122.12 to 16399.44)	35938.28 (46902.81 to 27438.78)	15623.44 (20472.73 to 11798.04)	15623.44 (20472.73 to 11798.04)	0 (-0.02 to 0.03)
Madagascar	317418.48 (416050.36 to 236565.36)	828851.31 (1085015.48 to 618855.22)	9096.25 (11840.29 to 6861.86)	9096.25 (11840.29 to 6861.86)	0 (0 to 0)
Malawi	257259.09 (337182.94 to 191693.22)	556750.92 (730030.61 to 414328.65)	9096.25 (11840.29 to 6861.86)	9096.25 (11840.29 to 6861.86)	0 (0 to 0)
Malaysia	913282.71 (1191702.21 to 682146.8)	1934507.73 (2520315.29 to 1468682.93)	15309.27 (19917.53 to 11504.14)	15646.49 (20413.15 to 11856.33)	0.07 (0.07 to 0.07)
Maldives	10628.15 (14031.57 to 7942.39)	45965.57 (60173.62 to 35092.05)	16217.84 (21305.42 to 12249.83)	16217.84 (21305.42 to 12249.83)	0 (0 to 0)
Mali	364721.36 (485173.22 to 272359.47)	1062477.23 (1415068.21 to 790193.16)	15302.52 (20208.52 to 11569.14)	15302.52 (20208.52 to 11569.14)	0 (0 to 0)
Malta	20566.75 (26980.53 to 15537.27)	21982.38 (28749.4 to 16710.28)	15718.66 (20651.57 to 11838.73)	15718.66 (20651.57 to 11838.73)	0 (0 to 0)
Marshall Islands	2028.39 (2680.71 to 1515.49)	3059.98 (4013.73 to 2311.89)	14679.37 (19237.1 to 11114.63)	14679.37 (19237.1 to 11114.63)	0 (0 to 0)
Mauritania	92105.05 (122456.04 to 68757.72)	205203.19 (272861.46 to 153182.54)	15302.52 (20208.52 to 11569.14)	15302.52 (20208.52 to 11569.14)	0 (0 to 0)
Mauritius	65022.69 (85533.82 to 49004.15)	74400.55 (97454.85 to 56494.16)	16217.84 (21305.42 to 12249.83)	16217.84 (21305.42 to 12249.83)	0 (0 to 0)
Mexico	3324392.09 (4246382.23 to 2572098.13)	5479023.05 (6936808.86 to 4278998.85)	11694.76 (14888.01 to 9126.82)	12055.58 (15264.34 to 9411.2)	0.1 (0.1 to 0.1)
Micronesia (Federated States of)	4748.57 (6267.9 to 3553.25)	5506.28 (7232.05 to 4152.59)	14679.37 (19237.1 to 11114.63)	14679.37 (19237.1 to 11114.63)	0 (0 to 0)
Mo0co	1487.53 (1944.29 to 1131.18)	1693.57 (2213.66 to 1287.28)	15718.66 (20651.57 to 11838.73)	15718.66 (20651.57 to 11838.73)	0 (0 to 0)
Mongolia	84977.03 (112507.32 to 63014.22)	143674.78 (188993.51 to 108079.88)	12488.33 (16431.67 to 9379.69)	12488.33 (16431.67 to 9379.69)	0 (0 to 0)
Montenegro	27213.93 (35447.69 to 20523.03)	25680.47 (33355.16 to 19475.1)	12137.66 (15819.94 to 9150.14)	12137.66 (15819.94 to 9150.14)	0 (0 to 0)
Morocco	1235736.55 (1612172.02 to 920799.67)	1942865.84 (2524272.18 to 1464028.5)	14652.1 (19046.8 to 11028.21)	14652.1 (19046.8 to 11028.21)	0 (0 to 0)
Mozambique	330659.42 (433409.9 to 246561.99)	809416.77 (1061822.72 to 602173.64)	9096.25 (11840.29 to 6861.86)	9096.25 (11840.29 to 6861.86)	0 (0 to 0)
Myanmar	2155361.01 (2840479.17 to 1616932.19)	3141608.79 (4128344.85 to 2369915.41)	16217.84 (21305.42 to 12249.83)	16217.84 (21305.42 to 12249.83)	0 (0 to 0)
0mibia	54742.75 (71994.73 to 40569.36)	106904.16 (140057.96 to 79859.24)	12901.57 (16846.98 to 9702.6)	12901.57 (16846.98 to 9702.6)	0 (0 to 0)
0uru	493.67 (649.3 to 371.56)	558.94 (735.22 to 420.48)	14679.37 (19237.1 to 11114.63)	14679.37 (19237.1 to 11114.63)	0 (0 to 0)
Nepal	1001478.81 (1319969.55 to 742423.02)	1703948.48 (2238322.31 to 1280556.82)	16788.27 (21999.1 to 12547.98)	16743.72 (21915.31 to 12655.61)	-0.01 (-0.01 to -0.01)
Netherlands	751580.72 (983732.13 to 575389.73)	817016.83 (1068066.4 to 622260.66)	13737.24 (18056.38 to 10459.4)	14990.71 (19652.84 to 11335.36)	0.26 (0.15 to 0.37)
New Zealand	168899.76 (214633.86 to 131821.33)	246699.39 (313197.1 to 193307.26)	14093.62 (17921.4 to 10997.75)	14093.62 (17921.4 to 10997.75)	0 (0 to 0)
Nicaragua	140422.49 (186138.04 to 104912.71)	279893.34 (367883.24 to 211506.1)	11754.96 (15437.15 to 8901.14)	11754.96 (15437.15 to 8901.14)	0 (0 to 0)
Niger	337593.14 (449437.66 to 251852.72)	1060677.91 (1414814.94 to 786942.61)	15302.52 (20208.52 to 11569.14)	15302.52 (20208.52 to 11569.14)	0 (0 to 0)
Nigeria	4548133.56 (5781924.48 to 3532192.42)	10878724.77 (13878442.76 to 8428854.27)	16152.92 (20500.07 to 12608.24)	15985.86 (20349.41 to 12509.2)	-0.03 (-0.05 to -0.01)
Niue	108.28 (142.42 to 81.47)	85.2 (111.58 to 64.56)	14679.37 (19237.1 to 11114.63)	14679.37 (19237.1 to 11114.63)	0 (0 to 0)
North Macedonia	86769.53 (113056.23 to 65437.14)	98132.55 (127242.5 to 74638.82)	12137.66 (15819.94 to 9150.14)	12137.66 (15819.94 to 9150.14)	0 (0 to 0)
Northern Maria0 Islands	2827.41 (3694.19 to 2149.44)	2713.94 (3549.23 to 2063.84)	14679.37 (19237.1 to 11114.63)	14679.37 (19237.1 to 11114.63)	0 (0 to 0)
Norway	216347.67 (273465.21 to 170723.79)	293903.93 (373240.53 to 231773.06)	14658.08 (18557.65 to 11540.63)	16111.5 (20497.22 to 12640.5)	0.29 (0.24 to 0.35)
Oman	122952.59 (159656.97 to 92358.04)	351797.92 (454277.82 to 267825.98)	14652.1 (19046.8 to 11028.21)	14652.1 (19046.8 to 11028.21)	0 (0 to 0)
Pakistan	5594159.36 (7143422.83 to 4334142.62)	12977492.76 (16559641.63 to 10074899.56)	15937.82 (20285.57 to 12436.2)	15825.68 (20172.26 to 12337.05)	-0.02 (-0.03 to 0)
Palau	838.98 (1101.91 to 632.54)	1128.44 (1470.44 to 862.17)	14679.37 (19237.1 to 11114.63)	14679.37 (19237.1 to 11114.63)	0 (0 to 0)
Palestine	91628.06 (119900.36 to 67776.05)	271794.03 (354243.18 to 202814.74)	14652.1 (19046.8 to 11028.21)	14652.1 (19046.8 to 11028.21)	0 (0 to 0)
Pa0ma	99238.3 (130744.06 to 74729.86)	176725.9 (232041.94 to 133831.14)	11754.96 (15437.15 to 8901.14)	11754.96 (15437.15 to 8901.14)	0 (0 to 0)
Papua New Guinea	199904.22 (263485.81 to 149991.85)	532967.7 (700722.43 to 401497.34)	14679.37 (19237.1 to 11114.63)	14679.37 (19237.1 to 11114.63)	0 (0 to 0)
Paraguay	219431.12 (290415.61 to 163404.87)	425891.31 (560457.49 to 319556.23)	16117.06 (21213.21 to 12104.46)	16117.06 (21213.21 to 12104.46)	0 (0 to 0)
Peru	534758.71 (697866.32 to 407553.86)	1065940.98 (1384518.6 to 808296.82)	7377.74 (9565.3 to 5663)	8196.49 (10652.76 to 6213.29)	0.35 (0.35 to 0.35)
Philippines	3469939.03 (4452256.69 to 2668461.51)	6958897.29 (8906239.34 to 5380364.36)	16900.61 (21617.89 to 13093.8)	16900.61 (21617.89 to 13093.8)	0 (0 to 0)
Poland	1687868.12 (2148349.76 to 1321672.79)	1649183.89 (2095508.07 to 1298486.05)	12800.45 (16300.26 to 10004.39)	12800.45 (16300.26 to 10004.39)	0 (0 to 0)
Portugal	539174.99 (707928.14 to 406249.88)	509945.14 (666792.32 to 387227.31)	15718.66 (20651.57 to 11838.73)	15718.66 (20651.57 to 11838.73)	0 (0 to 0)
Puerto Rico	157087.55 (205389.85 to 118985.95)	130091.83 (169379.16 to 99179.79)	12947.22 (16907.84 to 9826.37)	12947.22 (16907.84 to 9826.37)	0 (0 to 0)
Qatar	36992.83 (47729.81 to 28090.47)	280888.77 (361439 to 215141.5)	14652.1 (19046.8 to 11028.21)	14652.1 (19046.8 to 11028.21)	0 (0 to 0)
Republic of Korea	1960040.69 (2561893.36 to 1473632.89)	1995593.23 (2582792.04 to 1532064.47)	11284.76 (14741.84 to 8500.48)	10857.55 (14164.16 to 8219.68)	-0.12 (-0.21 to -0.03)
Republic of Moldova	161189.79 (210145.97 to 122943.61)	138806.69 (179921.66 to 106958.65)	10939.71 (14260.84 to 8336.65)	10939.71 (14260.84 to 8336.65)	0 (0 to 0)
Romania	987434.88 (1286442.2 to 745166.23)	762321.7 (989143.8 to 579597.97)	12137.66 (15819.94 to 9150.14)	12137.66 (15819.94 to 9150.14)	0 (0 to 0)
Russian Federation	6688670.25 (8448259.59 to 5255326.87)	6153671.37 (7771064.58 to 4852194.55)	12848.17 (16240.14 to 10064.32)	12848.17 (16240.14 to 10064.32)	-0.01 (-0.08 to 0.05)
Rwanda	184975.86 (242588.24 to 137817.92)	394245.05 (515686.07 to 294850.48)	9096.25 (11840.29 to 6861.86)	9096.25 (11840.29 to 6861.86)	0 (0 to 0)
Saint Kitts and Nevis	1741.67 (2283.43 to 1313.2)	2820.99 (3668.18 to 2154.2)	12947.22 (16907.84 to 9826.37)	12947.22 (16907.84 to 9826.37)	0 (0 to 0)
Saint Lucia	5797.28 (7608.35 to 4366.12)	8328.31 (10835.49 to 6356.32)	12947.22 (16907.84 to 9826.37)	12947.22 (16907.84 to 9826.37)	0 (0 to 0)
Saint Vincent and the Gre0dines	4848.13 (6365.03 to 3649.36)	5215.5 (6800.31 to 3968.25)	12947.22 (16907.84 to 9826.37)	12947.22 (16907.84 to 9826.37)	0 (0 to 0)
Samoa	8167.42 (10794.47 to 6099.02)	10410.95 (13694.23 to 7837.01)	14679.37 (19237.1 to 11114.63)	14679.37 (19237.1 to 11114.63)	0 (0 to 0)
San Marino	1326.07 (1738.46 to 1001.86)	1559.71 (2040.87 to 1182.86)	15718.66 (20651.57 to 11838.73)	15718.66 (20651.57 to 11838.73)	0 (0 to 0)
Sao Tome and Principe	5275.33 (7032.17 to 3917.12)	11633.21 (15426.48 to 8729.41)	15302.52 (20208.52 to 11569.14)	15302.52 (20208.52 to 11569.14)	0 (0 to 0)
Saudi Arabia	942395.33 (1232699.89 to 711119.38)	2801846.43 (3639710.27 to 2143149.93)	15081.72 (19686.26 to 11424.97)	15081.72 (19686.26 to 11424.97)	-0.01 (-0.01 to -0.01)
Senegal	324305.85 (431710.16 to 241584.75)	789541.76 (1049310.42 to 589274.48)	15302.52 (20208.52 to 11569.14)	15302.52 (20208.52 to 11569.14)	0 (0 to 0)
Serbia	416017.01 (540785.24 to 315085.58)	376631.38 (488868.76 to 286243.18)	12146.82 (15822.94 to 9171.48)	12146.82 (15822.94 to 9171.48)	0 (0 to 0)
Seychelles	4039.68 (5318.03 to 3036.82)	6765.47 (8864.98 to 5140.23)	16217.84 (21305.42 to 12249.83)	16217.84 (21305.42 to 12249.83)	0 (0 to 0)
Sierra Leone	184669.61 (245218.91 to 138224.35)	440346.18 (584565.46 to 329343.36)	15302.52 (20208.52 to 11569.14)	15302.52 (20208.52 to 11569.14)	0 (0 to 0)
Singapore	94788.42 (121265.79 to 74340.35)	190794.34 (244748.25 to 148045.66)	7657.4 (9790.66 to 6005.95)	8947.19 (11611.38 to 6820.87)	0.51 (0.51 to 0.51)
Slovakia	221315.27 (288359.73 to 166914.56)	227728.36 (295358.98 to 173274)	12137.66 (15819.94 to 9150.14)	12137.66 (15819.94 to 9150.14)	0 (0 to 0)
Slovenia	86687.76 (112747.81 to 65572.37)	82730.1 (107251.36 to 63008.75)	12137.66 (15819.94 to 9150.14)	12137.66 (15819.94 to 9150.14)	0 (0 to 0)
Solomon Islands	15346.92 (20275.2 to 11467.05)	33901.09 (44601.95 to 25494.72)	14679.37 (19237.1 to 11114.63)	14679.37 (19237.1 to 11114.63)	0 (0 to 0)
Somalia	220472.79 (289464.45 to 164022.03)	599334.62 (786226.94 to 445719.15)	9096.25 (11840.29 to 6861.86)	9096.25 (11840.29 to 6861.86)	0 (0 to 0)
South Africa	1624290.22 (2072454.94 to 1260180.7)	2807211.84 (3565308.11 to 2192003.42)	13552.31 (17229.56 to 10580.47)	13552.31 (17229.56 to 10580.47)	0 (0 to 0)
South Sudan	169680.57 (222362.94 to 126384.62)	265870.18 (348692.77 to 197652.43)	9096.25 (11840.29 to 6861.86)	9096.25 (11840.29 to 6861.86)	0 (0 to 0)
Spain	2198449.84 (2866070.52 to 1660033.09)	2420445.74 (3138980.94 to 1850830.35)	16330.3 (21294.69 to 12325.73)	16375.59 (21354.58 to 12384.75)	0.01 (-0.01 to 0.03)
Sri Lanka	985331.12 (1296511.87 to 741655.1)	1220315.52 (1601736.82 to 923008.33)	16217.84 (21305.42 to 12249.83)	16217.84 (21305.42 to 12249.83)	0 (0 to 0)
Sudan	916464.78 (1199068.92 to 680675.45)	2232406.11 (2913710.01 to 1662550.06)	14652.1 (19046.8 to 11028.21)	14652.1 (19046.8 to 11028.21)	0 (0 to 0)
Suri0me	17744.91 (23233.45 to 13409.21)	26007.75 (33950.07 to 19754.08)	12947.22 (16907.84 to 9826.37)	12947.22 (16907.84 to 9826.37)	0 (0 to 0)
Sweden	445765.79 (564655.49 to 349640.28)	516444.89 (652152.7 to 406164.7)	15415.39 (19567.33 to 12034.18)	15477.24 (19583.66 to 12103.02)	0.01 (0 to 0.02)
Switzerland	348528.09 (455038.45 to 265673.49)	420697.78 (551175.12 to 321358.47)	13994.18 (18365.41 to 10591.8)	14211.06 (18731.33 to 10739.48)	0.05 (0.03 to 0.07)
Syrian Arab Republic	596262.74 (780712.93 to 441678.37)	698515.53 (913590.91 to 524297.9)	14652.1 (19046.8 to 11028.21)	14652.1 (19046.8 to 11028.21)	0 (0 to 0)
Taiwan (Province of Chi0)	867468.05 (1134491.96 to 667145.74)	1039085.49 (1356250.18 to 789430.71)	11300.15 (14770.33 to 8695.01)	12481.81 (16415.35 to 9377.7)	0.31 (0.27 to 0.36)
Tajikistan	201790.06 (267059.31 to 149760.1)	434938.83 (573447.79 to 325302.74)	12488.33 (16431.67 to 9379.69)	12488.33 (16431.67 to 9379.69)	0 (0 to 0)
Thailand	3492541.76 (4612127.62 to 2612121.14)	3885940.59 (5073916.76 to 2943695.9)	16913.48 (22257.35 to 12715.77)	16889.83 (22133.96 to 12684.24)	0 (0 to 0)
Timor-Leste	41597.31 (54795.77 to 31226.2)	73947.93 (97497.96 to 55314.62)	16217.84 (21305.42 to 12249.83)	16217.84 (21305.42 to 12249.83)	0 (0 to 0)
Togo	157461.2 (209887.48 to 117015.54)	413976.21 (549693.63 to 309780)	15302.52 (20208.52 to 11569.14)	15302.52 (20208.52 to 11569.14)	0 (0 to 0)
Tokelau	68.53 (90.3 to 51.4)	69.31 (91.02 to 52.32)	14679.37 (19237.1 to 11114.63)	14679.37 (19237.1 to 11114.63)	0 (0 to 0)
Tonga	4401.27 (5817.23 to 3286.11)	4868.35 (6407.51 to 3659.65)	14679.37 (19237.1 to 11114.63)	14679.37 (19237.1 to 11114.63)	0 (0 to 0)
Trinidad and Tobago	54083.47 (70770.77 to 40923.15)	62260.13 (81049.26 to 47459.75)	12947.22 (16907.84 to 9826.37)	12947.22 (16907.84 to 9826.37)	0 (0 to 0)
Tunisia	417214.09 (544169.08 to 310873.63)	598066.07 (776501.16 to 452480.97)	14652.1 (19046.8 to 11028.21)	14652.1 (19046.8 to 11028.21)	0 (0 to 0)
Turkey	2717778.07 (3539060.14 to 2061222.89)	4045326.66 (5247591.69 to 3086096.22)	13400.67 (17397.64 to 10223.61)	13387.7 (17403.17 to 10180.71)	0.03 (-0.05 to 0.11)
Turkmenistan	144743.53 (191445.36 to 107507.58)	237581.42 (312591.42 to 178353.65)	12488.33 (16431.67 to 9379.69)	12488.33 (16431.67 to 9379.69)	0 (0 to 0)
Tuvalu	410.69 (539.94 to 309.38)	660.35 (866.79 to 498.58)	14679.37 (19237.1 to 11114.63)	14679.37 (19237.1 to 11114.63)	0 (0 to 0)
Uganda	435076.72 (570713.13 to 323611.49)	1167728.28 (1532686.75 to 867525.34)	9096.25 (11840.29 to 6861.86)	9096.25 (11840.29 to 6861.86)	0 (0 to 0)
Ukraine	2027516.08 (2567451.81 to 1586829.88)	1685293.68 (2130142.54 to 1324428.58)	11545.28 (14638.07 to 9010.22)	11545.28 (14638.07 to 9010.22)	0 (0 to 0)
United Arab Emirates	145218.91 (187365.16 to 110275.47)	909553.94 (1173438.37 to 705327.56)	14652.32 (19047.74 to 11027.58)	14652.31 (19041.92 to 11031.23)	0 (0 to 0)
United Kingdom	2935552.98 (3738776.98 to 2299769.37)	3348360.39 (4264698.1 to 2622974.58)	15195.93 (19395.56 to 11869.64)	15403.12 (19651.17 to 12007.97)	0.04 (0.04 to 0.05)
United Republic of Tanzania	597914.43 (788376.85 to 449517.74)	1548270.81 (2041740.1 to 1158964.88)	8318 (10867.59 to 6324.62)	8702.74 (11414.17 to 6586.34)	0.16 (0.13 to 0.18)
United States Virgin Islands	4658.88 (6089.63 to 3532.09)	3225.92 (4199.51 to 2461.87)	14242.51 (18111.57 to 11144.49)	13975.37 (17792.07 to 10972.47)	-0.08 (-0.14 to -0.01)
United States of America	12676017.76 (16078808.6 to 9940254.12)	15167915.61 (19278744.62 to 11956005.51)	12947.22 (16907.84 to 9826.37)	12947.22 (16907.84 to 9826.37)	0 (0 to 0)
Uruguay	106830.56 (140414.89 to 80297.01)	117665.38 (154156.4 to 88831.39)	10473.58 (13762.67 to 7877.7)	10473.58 (13762.67 to 7877.7)	0 (0 to 0)
Uzbekistan	812020.76 (1073775.43 to 603396.39)	1507617.04 (1982329.71 to 1133652.34)	12488.33 (16431.67 to 9379.69)	12488.33 (16431.67 to 9379.69)	0 (0 to 0)
Vanuatu	6916.81 (9119.55 to 5186.7)	15281.99 (20101.96 to 11500.4)	14679.37 (19237.1 to 11114.63)	14679.37 (19237.1 to 11114.63)	0 (0 to 0)
Venezuela (Bolivarian Republic of)	736778.62 (966884.9 to 557791.34)	1031116.08 (1364468.37 to 779579.05)	11340.54 (14816.38 to 8644.91)	11729.19 (15542.71 to 8844.3)	0.11 (0.11 to 0.11)
Viet 0m	3394653.75 (4478329.09 to 2542374.2)	5946837.52 (7801277.6 to 4510402.98)	16217.84 (21305.42 to 12249.83)	16217.84 (21305.42 to 12249.83)	0 (0 to 0)
Yemen	586935.03 (770673.41 to 434351.7)	1689220.93 (2208126.88 to 1258145.32)	14652.1 (19046.8 to 11028.21)	14652.1 (19046.8 to 11028.21)	0 (0 to 0)
Zambia	236228.82 (312563.93 to 175110.25)	652244.06 (859988.48 to 486898.99)	10433.17 (13673.16 to 7874.61)	10460.65 (13695.17 to 7909.15)	0 (-0.02 to 0.01)
Zimbabwe	385286.3 (507659.88 to 284673.85)	628772.32 (825845.2 to 467420.35)	12901.57 (16846.98 to 9702.6)	12901.57 (16846.98 to 9702.6)	0 (0 to 0)

## Sheet: TS4
Numbers and ASR per 100 000 cases of Incidence of migraine among 10-59 Male in 1990 and 2021, along with AAPC in ASR per 100 000 cases from 1990 to 2021, categorized by 204 countries.
Location	Incident cases		Incidence rates
	1990(95% UI)	2021(95% UI)	1990_per 100 000(95% UI)	2021_per 100 000(95% UI)	AAPC(95% CI)
Afghanistan	33553.85 (49550.86 to 20715.48)	121678.76 (181135.78 to 74603.58)	1044.41 (1580.74 to 627.98)	1044.41 (1580.74 to 627.98)	0 (0 to 0)
Albania	11419.31 (17725.34 to 6817.24)	7959.71 (12501.89 to 4660.01)	939.53 (1461.4 to 558.98)	939.53 (1461.4 to 558.98)	0 (0 to 0)
Algeria	97391.14 (144982.41 to 59828.88)	161064.51 (243931.17 to 97178.35)	1044.41 (1580.74 to 627.98)	1044.41 (1580.74 to 627.98)	0 (0 to 0)
American Samoa	206.77 (317.05 to 124.2)	212.53 (326.6 to 127.09)	1170.48 (1808.68 to 695.6)	1170.48 (1808.68 to 695.6)	0 (0 to 0)
Andorra	250.99 (391.89 to 145.35)	308.23 (480.74 to 177)	1177.07 (1812.76 to 690.74)	1177.07 (1812.76 to 690.74)	0 (0 to 0)
Angola	35612.38 (53958.85 to 21328.73)	110253.17 (166271.54 to 66382.74)	1007.28 (1546.21 to 594.65)	1007.28 (1546.21 to 594.65)	0 (0 to 0)
Antigua and Barbuda	198.99 (303.27 to 120.56)	281.43 (434.81 to 166.66)	946.47 (1447.43 to 570.34)	946.47 (1447.43 to 570.34)	0 (0 to 0)
Argenti0	93089.05 (143229.54 to 54926.73)	131515.19 (206282.49 to 76868.96)	834.49 (1289.32 to 489.88)	856.41 (1338.56 to 503.46)	0.09 (0.09 to 0.09)
Armenia	11489.6 (17915.93 to 6768.53)	9271.13 (14528.1 to 5434.62)	978.46 (1522.86 to 576.3)	978.46 (1522.86 to 576.3)	0 (0 to 0)
Australia	60610.66 (93943.83 to 35638.45)	81154.5 (126033.86 to 47609.19)	1038.04 (1598.5 to 614.84)	1038.04 (1598.5 to 614.84)	0 (0 to 0)
Austria	28603.09 (44320.38 to 16950.5)	29375.96 (45709.75 to 17343.31)	1128.78 (1728.42 to 680.69)	1128.78 (1728.42 to 680.69)	0 (-0.01 to 0.01)
Azerbaijan	24993.03 (38854.49 to 14747.05)	36804.2 (57641.63 to 21572.59)	978.46 (1522.86 to 576.3)	978.46 (1522.86 to 576.3)	0 (0 to 0)
Bahamas	914.18 (1393.38 to 553.51)	1298.79 (1992.94 to 777.31)	946.47 (1447.43 to 570.34)	946.47 (1447.43 to 570.34)	0 (0 to 0)
Bahrain	2339.11 (3580.24 to 1399.52)	7575.16 (11721.38 to 4428.47)	1044.41 (1580.74 to 627.98)	1044.41 (1580.74 to 627.98)	0 (0 to 0)
Bangladesh	463668.14 (709389.66 to 279064.81)	704772.93 (1087794.14 to 417961.95)	1218.35 (1882.2 to 720.99)	1218.35 (1882.2 to 720.99)	0 (0 to 0)
Barbados	827.57 (1268.97 to 497.59)	844.04 (1304.59 to 499.11)	946.47 (1447.43 to 570.34)	946.47 (1447.43 to 570.34)	0 (0 to 0)
Belarus	28214.35 (43673.05 to 16558.79)	23102.32 (36010.95 to 13470.43)	830.58 (1276.86 to 490.2)	830.58 (1276.86 to 490.2)	0 (0 to 0)
Belgium	40794.14 (63604.61 to 23635.33)	42450.31 (66887.28 to 24554.4)	1272.79 (1960.81 to 749.69)	1300.58 (2030.69 to 763.85)	0.07 (0.07 to 0.07)
Belize	648.21 (973.5 to 400.89)	1520.19 (2320.88 to 917.16)	946.47 (1447.43 to 570.34)	946.47 (1447.43 to 570.34)	0 (0 to 0)
Benin	17367.97 (25744.96 to 10688.52)	53648.76 (80051.75 to 32646.52)	1158.34 (1762.34 to 690.01)	1158.34 (1762.34 to 690.01)	0 (0 to 0)
Bermuda	189.57 (294.38 to 111.97)	162.53 (252.36 to 95.45)	946.47 (1447.43 to 570.34)	946.47 (1447.43 to 570.34)	0 (0 to 0)
Bhutan	3058.47 (4689.7 to 1832.17)	3601.89 (5591.73 to 2116.68)	1218.35 (1882.2 to 720.99)	1218.35 (1882.2 to 720.99)	0 (0 to 0)
Bolivia (Pluri0tio0l State of)	15629.44 (23485.99 to 9570.45)	29409.12 (44885.16 to 17600.94)	692.42 (1057.43 to 414.11)	692.42 (1057.43 to 414.11)	0 (0 to 0)
Bosnia and Herzegovi0	15503.96 (24238.12 to 9166.23)	9297.05 (14597.82 to 5444.08)	939.53 (1461.4 to 558.98)	939.53 (1461.4 to 558.98)	0 (0 to 0)
Botswa0	4472.84 (6740.9 to 2692.34)	9028.74 (13873.42 to 5341.82)	1007.28 (1546.21 to 594.65)	1007.28 (1546.21 to 594.65)	0 (0 to 0)
Brazil	622061.1 (865475.13 to 425737.34)	808036.87 (1139561.15 to 542186.83)	1108.45 (1557.34 to 748.06)	1129.57 (1576.79 to 768.2)	0.05 (0.03 to 0.07)
Brunei Darussalam	760.55 (1167.17 to 450.73)	1293.77 (2006.17 to 756.37)	722.67 (1109.05 to 428.03)	722.67 (1109.05 to 428.03)	0 (0 to 0)
Bulgaria	26605.58 (41541.64 to 15727.36)	18520.15 (29093.42 to 10854.84)	939.53 (1461.4 to 558.98)	939.53 (1461.4 to 558.98)	0 (0 to 0)
Burki0 Faso	34421.03 (50902.92 to 21196.44)	87039.76 (129876.57 to 53044.1)	1158.34 (1762.34 to 690.01)	1158.34 (1762.34 to 690.01)	0 (0 to 0)
Burundi	12815.17 (19583.82 to 7719.17)	33597.86 (51453.28 to 20197.6)	722.15 (1118.53 to 426.82)	722.15 (1118.53 to 426.82)	0 (0 to 0)
Cabo Verde	1294.55 (1918.65 to 790.16)	2482.41 (3795.07 to 1474.68)	1158.34 (1762.34 to 690.01)	1158.34 (1762.34 to 690.01)	0 (0 to 0)
Cambodia	41666.82 (63138.64 to 24826.96)	78751.11 (121481.03 to 46176.02)	1272.72 (1964.77 to 743.32)	1272.72 (1964.77 to 743.32)	0 (0 to 0)
Cameroon	39431.07 (58754.79 to 24057.15)	132967.61 (198956.73 to 80756.38)	1158.34 (1762.34 to 690.01)	1158.34 (1762.34 to 690.01)	0 (0 to 0)
Ca0da	87507.36 (134808.79 to 52162.81)	101705.04 (157161.86 to 59919.11)	938.76 (1436.81 to 564.1)	939.05 (1436.68 to 559.72)	0 (0 to 0)
Central African Republic	9133.21 (13829.78 to 5469.53)	19468.8 (29487.91 to 11641.95)	1007.28 (1546.21 to 594.65)	1007.28 (1546.21 to 594.65)	0 (0 to 0)
Chad	21612.77 (32138.34 to 13209.88)	67564.83 (100135.13 to 41402.22)	1158.34 (1762.34 to 690.01)	1158.34 (1762.34 to 690.01)	0 (0 to 0)
Chile	36285.85 (56212.87 to 21498.4)	49050.92 (75769.5 to 29004.14)	767.23 (1188.75 to 455.08)	783.68 (1201.21 to 467.29)	0.07 (0.07 to 0.07)
Chi0	3860534.54 (5564032.35 to 2470406.75)	4254306.91 (6210191.67 to 2724140.29)	846.83 (1218.52 to 543.75)	913.18 (1325.68 to 588.47)	0.26 (0.18 to 0.35)
Colombia	100879.92 (151079.97 to 61990.3)	144990.51 (222951.41 to 87267.73)	849.5 (1283.73 to 514.83)	864.6 (1318.73 to 527.49)	0.06 (0.06 to 0.06)
Comoros	1126.19 (1715.47 to 678.09)	1970.89 (3041.66 to 1169.2)	722.15 (1118.53 to 426.82)	722.15 (1118.53 to 426.82)	0 (0 to 0)
Congo	8396.05 (12689.22 to 5032.01)	20010.34 (30477.33 to 11913.01)	1007.28 (1546.21 to 594.65)	1007.28 (1546.21 to 594.65)	0 (0 to 0)
Cook Islands	82.68 (126.9 to 49.58)	63.82 (98.66 to 37.76)	1170.48 (1808.68 to 695.6)	1170.48 (1808.68 to 695.6)	0 (0 to 0)
Costa Rica	9445.14 (14294.81 to 5828.9)	13450.84 (20699.73 to 8105.6)	853.23 (1303.72 to 519.25)	853.23 (1303.72 to 519.25)	0 (0 to 0)
Coted'Ivoire	49276.06 (73733.5 to 29930.03)	119276.9 (179240.45 to 72156.76)	1158.34 (1762.34 to 690.01)	1158.34 (1762.34 to 690.01)	0 (0 to 0)
Croatia	15558 (24360.28 to 9179.2)	11456.64 (17876.68 to 6643.73)	939.53 (1461.4 to 558.98)	933.93 (1440.31 to 550.07)	0 (-0.08 to 0.09)
Cuba	36882.37 (56911.46 to 21823.76)	31982.78 (49655.81 to 18774.74)	946.47 (1447.43 to 570.34)	946.47 (1447.43 to 570.34)	0 (0 to 0)
Cyprus	3226.56 (4980.8 to 1888.58)	5021.96 (7845.65 to 2913.43)	1177.07 (1812.76 to 690.74)	1177.07 (1812.76 to 690.74)	0 (0 to 0)
Czechia	33178.99 (51698.32 to 19714.44)	29512.18 (46265.34 to 17337.6)	939.53 (1461.4 to 558.98)	939.53 (1461.4 to 558.98)	0 (0 to 0)
Democratic People's Republic of Korea	62987.45 (97878.7 to 37020.55)	86176.6 (135207 to 50183.56)	916.82 (1422.92 to 540.67)	916.82 (1422.92 to 540.67)	0 (0 to 0)
Democratic Republic of the Congo	127627.47 (192971.11 to 76551.57)	332076.31 (503196.65 to 198716.31)	1007.28 (1546.21 to 594.65)	1007.28 (1546.21 to 594.65)	0 (0 to 0)
Denmark	18197.44 (27909.46 to 10853.9)	18519.58 (28370.63 to 10957.91)	1066.22 (1623.48 to 643.25)	1085.13 (1649.24 to 651.07)	0.06 (0.06 to 0.06)
Djibouti	1168.27 (1789.16 to 699.09)	3645.65 (5636.84 to 2162.74)	722.15 (1118.53 to 426.82)	722.15 (1118.53 to 426.82)	0 (0 to 0)
Dominica	252.52 (382.53 to 154.15)	223.67 (344.15 to 133.36)	946.47 (1447.43 to 570.34)	946.47 (1447.43 to 570.34)	0 (0 to 0)
Dominican Republic	24421.42 (36967.37 to 14919.93)	36823.54 (56558.99 to 22044.21)	946.47 (1447.43 to 570.34)	946.47 (1447.43 to 570.34)	0 (0 to 0)
Ecuador	27334.56 (40817.48 to 16929.64)	48699.99 (74849.41 to 28933.04)	742.41 (1125.08 to 449.52)	761.62 (1172.15 to 451.91)	0.08 (0.08 to 0.08)
Egypt	215579.04 (323077.81 to 133125.02)	404515.82 (589033.78 to 255880.91)	1052.88 (1600.87 to 639.39)	1031.07 (1509.89 to 645.64)	-0.07 (-0.07 to -0.07)
El Salvador	16347.88 (24483.92 to 10219.97)	18305.99 (27855.7 to 11176.41)	853.23 (1303.72 to 519.25)	853.23 (1303.72 to 519.25)	0 (0 to 0)
Equatorial Guinea	1318.09 (1987.71 to 792.47)	6630.06 (10046.93 to 3962)	1007.28 (1546.21 to 594.65)	1007.28 (1546.21 to 594.65)	0 (0 to 0)
Eritrea	8505.39 (12954.41 to 5124)	17989.72 (27682.65 to 10725.28)	722.15 (1118.53 to 426.82)	722.15 (1118.53 to 426.82)	0 (0 to 0)
Estonia	4203.63 (6506.29 to 2461.42)	3207.18 (4993.23 to 1870.53)	830.58 (1276.86 to 490.2)	830.58 (1276.86 to 490.2)	0 (0 to 0)
Eswatini	2644.14 (3972.93 to 1595.45)	4327.41 (6586.52 to 2579.46)	1007.28 (1546.21 to 594.65)	1007.28 (1546.21 to 594.65)	0 (0 to 0)
Ethiopia	111723.46 (159735.58 to 73092.95)	276026.69 (394188.95 to 179461.45)	675.22 (976.49 to 435.82)	687.94 (989.27 to 444.26)	0.06 (0.06 to 0.06)
Fiji	3337.09 (5116.75 to 2006.72)	3873.38 (5981.48 to 2305.06)	1170.48 (1808.68 to 695.6)	1170.48 (1808.68 to 695.6)	0 (0 to 0)
Finland	19401.64 (30125.82 to 11282.21)	18347.66 (28502.12 to 10648.72)	1177.07 (1812.76 to 690.74)	1177.07 (1812.76 to 690.74)	0 (0 to 0)
France	227486.25 (351787.21 to 133252.14)	224856.66 (348580.49 to 131414.83)	1203.27 (1846.16 to 714.59)	1199.05 (1845.65 to 708.39)	-0.01 (-0.03 to 0.02)
Gabon	3381.34 (5135.54 to 2021.97)	6347.67 (9673.48 to 3774.44)	1007.28 (1546.21 to 594.65)	1007.28 (1546.21 to 594.65)	0 (0 to 0)
Gambia	3853.76 (5751.28 to 2345.61)	9970.72 (14914.06 to 6046.2)	1158.34 (1762.34 to 690.01)	1158.34 (1762.34 to 690.01)	0 (0 to 0)
Georgia	17764.05 (27744.33 to 10422.74)	10660.39 (16685.02 to 6238.09)	978.46 (1522.86 to 576.3)	978.46 (1522.86 to 576.3)	0 (0 to 0)
Germany	305167.38 (477130.93 to 176716.06)	289290 (452889.42 to 167348.91)	1199.59 (1850.9 to 711.61)	1225.72 (1889.65 to 725.18)	0.05 (0 to 0.1)
Gha0	59188.34 (88412.06 to 36005.99)	140587.59 (211444.42 to 84851.96)	1158.34 (1762.34 to 690.01)	1158.34 (1762.34 to 690.01)	0 (0 to 0)
Greece	41255.46 (63934 to 24322.88)	33417.15 (51867.52 to 19438.29)	1219.28 (1879.52 to 725.82)	1218.92 (1873.82 to 721.05)	0 (0 to 0)
Greenland	221.83 (347.46 to 128.97)	181.78 (283.83 to 105.86)	980.34 (1520.89 to 575.94)	980.34 (1520.89 to 575.94)	0 (0 to 0)
Gre0da	286.24 (431.88 to 176.06)	346.36 (533.83 to 205.35)	946.47 (1447.43 to 570.34)	946.47 (1447.43 to 570.34)	0 (0 to 0)
Guam	640.22 (992.39 to 378.7)	619.81 (960.96 to 365.48)	1170.48 (1808.68 to 695.6)	1170.48 (1808.68 to 695.6)	0 (0 to 0)
Guatemala	24709.85 (36769.54 to 15624.5)	48454.36 (73614.88 to 29643.7)	853.23 (1303.72 to 519.25)	853.23 (1303.72 to 519.25)	0 (0 to 0)
Guinea	21220.63 (31654.08 to 12953.91)	51957.43 (77320.16 to 31745.98)	1158.34 (1762.34 to 690.01)	1158.34 (1762.34 to 690.01)	0 (0 to 0)
Guinea-Bissau	3807.71 (5655.73 to 2330.49)	8398.87 (12545.54 to 5110.15)	1158.34 (1762.34 to 690.01)	1158.34 (1762.34 to 690.01)	0 (0 to 0)
Guya0	2738.36 (4149.21 to 1672.04)	2522.41 (3859 to 1513.56)	946.47 (1447.43 to 570.34)	946.47 (1447.43 to 570.34)	0 (0 to 0)
Haiti	20522.1 (30905.62 to 12651.88)	43879.01 (66812.25 to 26643.04)	946.47 (1447.43 to 570.34)	946.47 (1447.43 to 570.34)	0 (0 to 0)
Honduras	14321.81 (21335.45 to 9038.3)	31424.53 (47665.65 to 19276.57)	853.23 (1303.72 to 519.25)	853.23 (1303.72 to 519.25)	0 (0 to 0)
Hungary	32694.42 (50965.45 to 19425.35)	26314.77 (41323.61 to 15389.11)	939.53 (1461.4 to 558.98)	939.53 (1461.4 to 558.98)	0 (0 to 0)
Iceland	1049.83 (1623.76 to 613.54)	1304.16 (2021.73 to 759.41)	1177.07 (1812.76 to 690.74)	1177.07 (1812.76 to 690.74)	0 (0 to 0)
India	3858869.32 (5523539.8 to 2519779.7)	6644444.07 (9487574.12 to 4307836.13)	1227.85 (1765.09 to 797.23)	1231.33 (1757.25 to 798.91)	0.03 (-0.04 to 0.1)
Indonesia	910378.11 (1309111.56 to 590880.52)	1370866.6 (1987016.75 to 881169.39)	1336.41 (1932.13 to 861.81)	1336.41 (1932.13 to 861.81)	0 (0 to 0)
Iran (Islamic Republic of)	226721.83 (316986.25 to 151785.47)	341471.99 (487268.74 to 224586.45)	1107.98 (1571.42 to 729.46)	1110.5 (1572.99 to 734.91)	-0.05 (-0.2 to 0.11)
Iraq	71050.36 (105832.44 to 43599.35)	168310.73 (253654.67 to 101731.97)	1044.41 (1580.74 to 627.98)	1044.41 (1580.74 to 627.98)	0 (0 to 0)
Ireland	14868.07 (22832.35 to 8749.67)	17870.5 (27588.51 to 10430.96)	1177.07 (1812.76 to 690.74)	1177.07 (1812.76 to 690.74)	0 (0 to 0)
Israel	20254.4 (31057.59 to 11958.23)	36537.03 (56211.44 to 21445.32)	1177.07 (1812.76 to 690.74)	1177.07 (1812.76 to 690.74)	0 (0 to 0)
Italy	234574.82 (337602.45 to 151714.84)	203339.66 (294176.75 to 131946.11)	1270.59 (1815.03 to 830.1)	1281.13 (1835.54 to 841.57)	0.01 (-0.17 to 0.19)
Jamaica	8030.54 (12145.98 to 4911.84)	9322.33 (14360.91 to 5548.87)	946.47 (1447.43 to 570.34)	946.47 (1447.43 to 570.34)	0 (0 to 0)
Japan	277802.58 (404429.19 to 178642.07)	229290.83 (334095.73 to 146675.37)	660.09 (955.48 to 427.25)	714.92 (1035.24 to 461.82)	0.26 (0.26 to 0.26)
Jordan	15201 (22672.27 to 9277.23)	52967.19 (80146.89 to 31828.17)	1044.41 (1580.74 to 627.98)	1044.41 (1580.74 to 627.98)	0 (0 to 0)
Kazakhstan	56147.13 (87362.21 to 33170.01)	61764.95 (96259.75 to 36432.36)	978.46 (1522.86 to 576.3)	978.46 (1522.86 to 576.3)	0 (0 to 0)
Kenya	59034.08 (84110.7 to 38257.29)	141927.71 (203159.61 to 91407.51)	754.61 (1085.26 to 482.84)	754.61 (1085.26 to 482.84)	0 (0 to 0)
Kiribati	300.23 (460.29 to 180.32)	504.93 (775.03 to 303.33)	1170.48 (1808.68 to 695.6)	1170.48 (1808.68 to 695.6)	0 (0 to 0)
Kuwait	7997.51 (12212.72 to 4844.8)	19348.43 (30313.89 to 11376.94)	1073.43 (1624.19 to 652.12)	1069.03 (1632.9 to 640.56)	-0.01 (-0.01 to -0.01)
Kyrgyzstan	14892.81 (23061.05 to 8845.41)	23376.44 (36289.34 to 13837.63)	978.46 (1522.86 to 576.3)	978.46 (1522.86 to 576.3)	0 (0 to 0)
Lao People's Democratic Republic	17592.22 (26718.09 to 10475.21)	34695.67 (53542.93 to 20294.67)	1272.72 (1964.77 to 743.32)	1272.72 (1964.77 to 743.32)	0 (0 to 0)
Latvia	6985.75 (10827.82 to 4075.92)	4365.8 (6801.29 to 2539.59)	830.58 (1276.86 to 490.2)	830.58 (1276.86 to 490.2)	0 (0 to 0)
Lebanon	10765.8 (16139.74 to 6541.38)	20495.97 (31237.89 to 12267.18)	1044.41 (1580.74 to 627.98)	1044.41 (1580.74 to 627.98)	0 (0 to 0)
Lesotho	4721.76 (7092.65 to 2860.05)	7050.08 (10749.15 to 4191.5)	1007.28 (1546.21 to 594.65)	1007.28 (1546.21 to 594.65)	0 (0 to 0)
Liberia	9331.9 (13961.71 to 5676.69)	23812.65 (35736.54 to 14412.82)	1158.34 (1762.34 to 690.01)	1158.34 (1762.34 to 690.01)	0 (0 to 0)
Libya	17151.42 (25576.94 to 10519.01)	27881.88 (42578.67 to 16585.15)	1044.41 (1580.74 to 627.98)	1044.41 (1580.74 to 627.98)	0 (0 to 0)
Lithuania	9278.55 (14413.58 to 5481.29)	5926.86 (9243.76 to 3484.64)	768.68 (1188.47 to 457.55)	768.68 (1188.47 to 457.55)	-0.03 (-0.03 to -0.03)
Luxembourg	1462.13 (2273.3 to 860.2)	2357.38 (3664.58 to 1385.74)	1168.16 (1788.25 to 700.17)	1168.16 (1788.25 to 700.17)	0 (-0.01 to 0.02)
Madagascar	28935.48 (44193.81 to 17408.87)	73731.47 (112888.03 to 44167.8)	722.15 (1118.53 to 426.82)	722.15 (1118.53 to 426.82)	0 (0 to 0)
Malawi	23413.94 (35760.86 to 14069.6)	51061.33 (77983.28 to 30663.92)	722.15 (1118.53 to 426.82)	722.15 (1118.53 to 426.82)	0 (0 to 0)
Malaysia	78964.19 (120838.99 to 47070.17)	150342.85 (230369.7 to 88763.14)	1227.88 (1891.93 to 725.52)	1244.62 (1898.51 to 738.83)	0.04 (0.04 to 0.04)
Maldives	957.7 (1452.68 to 568.99)	3249.21 (5133.43 to 1883.34)	1272.72 (1964.77 to 743.32)	1272.72 (1964.77 to 743.32)	0 (0 to 0)
Mali	31638.14 (47108.53 to 19334.88)	94201.55 (139919.44 to 57522.07)	1158.34 (1762.34 to 690.01)	1158.34 (1762.34 to 690.01)	0 (0 to 0)
Malta	1497.37 (2313.79 to 877.19)	1448.7 (2260.44 to 837.65)	1177.07 (1812.76 to 690.74)	1177.07 (1812.76 to 690.74)	0 (0 to 0)
Marshall Islands	191.35 (290.09 to 117.12)	251.25 (387.5 to 149.88)	1170.48 (1808.68 to 695.6)	1170.48 (1808.68 to 695.6)	0 (0 to 0)
Mauritania	7907.32 (11811.76 to 4807.89)	17649.14 (26349 to 10734.53)	1158.34 (1762.34 to 690.01)	1158.34 (1762.34 to 690.01)	0 (0 to 0)
Mauritius	5349.16 (8238.69 to 3145.1)	5316.15 (8296.25 to 3056.71)	1272.72 (1964.77 to 743.32)	1272.72 (1964.77 to 743.32)	0 (0 to 0)
Mexico	268837.76 (380115.72 to 179295.77)	392854.08 (561838.23 to 259435.77)	852.73 (1216.72 to 561.19)	873.94 (1247.78 to 578.59)	0.08 (0.08 to 0.08)
Micronesia (Federated States of)	440.52 (669.64 to 268.73)	456.33 (702.69 to 272.12)	1170.48 (1808.68 to 695.6)	1170.48 (1808.68 to 695.6)	0 (0 to 0)
Mo0co	96.09 (150.12 to 55.16)	107.81 (167.82 to 61.96)	1177.07 (1812.76 to 690.74)	1177.07 (1812.76 to 690.74)	0 (0 to 0)
Mongolia	7474.51 (11510.08 to 4459.54)	11182.22 (17406.55 to 6606.45)	978.46 (1522.86 to 576.3)	978.46 (1522.86 to 576.3)	0 (0 to 0)
Montenegro	2092.03 (3262.16 to 1241.54)	1839.65 (2881.82 to 1081.9)	939.53 (1461.4 to 558.98)	939.53 (1461.4 to 558.98)	0 (0 to 0)
Morocco	95452.83 (142845.15 to 58250.18)	136871.18 (207587.69 to 82054.62)	1044.41 (1580.74 to 627.98)	1044.41 (1580.74 to 627.98)	0 (0 to 0)
Mozambique	30135.25 (45883.1 to 18213.79)	74990.41 (114200.85 to 45232.38)	722.15 (1118.53 to 426.82)	722.15 (1118.53 to 426.82)	0 (0 to 0)
Myanmar	186039.34 (284452.38 to 109824.08)	249412.71 (384563.29 to 145576.65)	1272.72 (1964.77 to 743.32)	1272.72 (1964.77 to 743.32)	0 (0 to 0)
0mibia	4887.42 (7392.77 to 2924.83)	8902.69 (13581.72 to 5290.75)	1007.28 (1546.21 to 594.65)	1007.28 (1546.21 to 594.65)	0 (0 to 0)
0uru	42.37 (64.97 to 25.48)	48.1 (73.82 to 28.88)	1170.48 (1808.68 to 695.6)	1170.48 (1808.68 to 695.6)	0 (0 to 0)
Nepal	84695.15 (129247.07 to 50705.07)	136531.46 (210659.6 to 81160.3)	1274.14 (1971.45 to 747.75)	1273.53 (1970.33 to 755.08)	0 (0 to 0)
Netherlands	55598.1 (84929.81 to 32730.36)	56026.63 (86555.44 to 32823.42)	1083.58 (1639.62 to 646.9)	1147.51 (1756.05 to 682.39)	0.16 (0.09 to 0.24)
New Zealand	12808.83 (18422.93 to 8198.51)	17673.46 (25467.75 to 11285.59)	1086.71 (1558 to 698.1)	1086.71 (1558 to 698.1)	0 (0 to 0)
Nicaragua	11839.38 (17641.9 to 7462.18)	20772.72 (31676.11 to 12678.62)	853.23 (1303.72 to 519.25)	853.23 (1303.72 to 519.25)	0 (0 to 0)
Niger	29512.09 (43932.62 to 18047.56)	96427.36 (142804.25 to 59143.52)	1158.34 (1762.34 to 690.01)	1158.34 (1762.34 to 690.01)	0 (0 to 0)
Nigeria	375145.52 (532569.63 to 245824.58)	958633.18 (1360121.91 to 630549.62)	1225.49 (1753.41 to 796.27)	1219.86 (1751.36 to 792.73)	-0.01 (-0.02 to -0.01)
Niue	9.29 (14.23 to 5.59)	6.65 (10.29 to 3.94)	1170.48 (1808.68 to 695.6)	1170.48 (1808.68 to 695.6)	0 (0 to 0)
North Macedonia	6681.6 (10409.13 to 3968.69)	6771.21 (10665.07 to 3958.21)	939.53 (1461.4 to 558.98)	939.53 (1461.4 to 558.98)	0 (0 to 0)
Northern Maria0 Islands	215.25 (335.96 to 126.52)	205.89 (318.75 to 121.72)	1170.48 (1808.68 to 695.6)	1170.48 (1808.68 to 695.6)	0 (0 to 0)
Norway	16258.91 (23432.18 to 10524.57)	20254.02 (29115.63 to 13112.42)	1157.18 (1659 to 754.4)	1225.87 (1750.57 to 801.56)	0.18 (0.09 to 0.27)
Oman	9047.09 (13683.88 to 5491.15)	23180.34 (35797.02 to 13759.7)	1044.41 (1580.74 to 627.98)	1044.41 (1580.74 to 627.98)	0 (0 to 0)
Pakistan	503294.78 (712655.01 to 332680.07)	1112430.56 (1584084.21 to 731606.34)	1262.72 (1807.39 to 826.18)	1262.72 (1807.39 to 826.18)	0.01 (0.01 to 0.01)
Palau	69.92 (107.93 to 41.65)	79.85 (124.74 to 46.58)	1170.48 (1808.68 to 695.6)	1170.48 (1808.68 to 695.6)	0 (0 to 0)
Palestine	7481.85 (11097.69 to 4613.41)	20688.46 (31014.57 to 12588.31)	1044.41 (1580.74 to 627.98)	1044.41 (1580.74 to 627.98)	0 (0 to 0)
Pa0ma	7620.76 (11549.63 to 4684.46)	12762.48 (19509.78 to 7751.04)	853.23 (1303.72 to 519.25)	853.23 (1303.72 to 519.25)	0 (0 to 0)
Papua New Guinea	17694.06 (27042.88 to 10679.51)	45077.6 (69232.67 to 27016.59)	1170.48 (1808.68 to 695.6)	1170.48 (1808.68 to 695.6)	0 (0 to 0)
Paraguay	15937.08 (23337.03 to 10080.79)	28305.88 (42283.47 to 17451.6)	1070.42 (1598.04 to 660.43)	1070.42 (1598.04 to 660.43)	0 (0 to 0)
Peru	45176.32 (67083.83 to 28391.91)	80922.32 (123377.57 to 48130.72)	573.87 (862.52 to 355.19)	627.98 (955.44 to 375.05)	0.3 (0.3 to 0.3)
Philippines	305906.26 (439546.33 to 198686.23)	565734.78 (816694.85 to 365291.28)	1336.41 (1932.13 to 861.81)	1336.41 (1932.13 to 861.81)	0 (0 to 0)
Poland	127769.38 (184003.21 to 83202.11)	113528.72 (164419.86 to 73387.68)	980.97 (1408.58 to 639.12)	980.97 (1408.58 to 639.12)	0 (0 to 0)
Portugal	39784.36 (61366.83 to 23243.75)	33242.52 (51720.1 to 19134.95)	1177.07 (1812.76 to 690.74)	1177.07 (1812.76 to 690.74)	0 (0 to 0)
Puerto Rico	11804.57 (17980.18 to 7148.76)	8800.29 (13601.92 to 5199.07)	946.47 (1447.43 to 570.34)	946.47 (1447.43 to 570.34)	0 (0 to 0)
Qatar	2444.73 (3779.33 to 1445.88)	17358.03 (27153.12 to 10141.82)	1044.41 (1580.74 to 627.98)	1044.41 (1580.74 to 627.98)	0 (0 to 0)
Republic of Korea	143058.81 (222969.12 to 83732.33)	120980.01 (191354.09 to 68743.6)	811.2 (1261.22 to 477.23)	789.57 (1224.62 to 457.75)	-0.08 (-0.15 to -0.02)
Republic of Moldova	12250.73 (18883.68 to 7244.65)	9385.75 (14683.43 to 5455.51)	830.58 (1276.86 to 490.2)	830.58 (1276.86 to 490.2)	0 (0 to 0)
Romania	75491.72 (117507.93 to 44842.82)	53243.27 (83410.4 to 31249.38)	939.53 (1461.4 to 558.98)	939.53 (1461.4 to 558.98)	0 (0 to 0)
Russian Federation	470867.78 (680764.72 to 306973.33)	411136.97 (595837.51 to 267806.08)	943 (1357.14 to 617.26)	943 (1357.14 to 617.26)	-0.01 (-0.05 to 0.03)
Rwanda	16969.21 (25933.87 to 10222.76)	34434.9 (52939.39 to 20564.45)	722.15 (1118.53 to 426.82)	722.15 (1118.53 to 426.82)	0 (0 to 0)
Saint Kitts and Nevis	138.04 (209.23 to 84.42)	186.53 (289.99 to 109.47)	946.47 (1447.43 to 570.34)	946.47 (1447.43 to 570.34)	0 (0 to 0)
Saint Lucia	467.82 (705.57 to 287.3)	556.12 (862.44 to 327.29)	946.47 (1447.43 to 570.34)	946.47 (1447.43 to 570.34)	0 (0 to 0)
Saint Vincent and the Gre0dines	393.46 (593.33 to 241.86)	365.74 (561.89 to 218.24)	946.47 (1447.43 to 570.34)	946.47 (1447.43 to 570.34)	0 (0 to 0)
Samoa	756.27 (1150.89 to 458.66)	887.05 (1359.74 to 532.72)	1170.48 (1808.68 to 695.6)	1170.48 (1808.68 to 695.6)	0 (0 to 0)
San Marino	93.88 (145.7 to 54.33)	102.79 (159.43 to 59.28)	1177.07 (1812.76 to 690.74)	1177.07 (1812.76 to 690.74)	0 (0 to 0)
Sao Tome and Principe	474.8 (702.8 to 290.97)	951.68 (1432.82 to 573.72)	1158.34 (1762.34 to 690.01)	1158.34 (1762.34 to 690.01)	0 (0 to 0)
Saudi Arabia	69725.14 (105596.71 to 42730.06)	179935.85 (280440.74 to 106493.28)	1062.04 (1618.66 to 644.5)	1062.04 (1618.66 to 644.5)	0 (0 to 0)
Senegal	28450.24 (42338.39 to 17365.66)	67360.15 (100742.79 to 40817.95)	1158.34 (1762.34 to 690.01)	1158.34 (1762.34 to 690.01)	0 (0 to 0)
Serbia	30947.64 (48349.39 to 18300.3)	26966.3 (42280.98 to 15873.45)	939.53 (1461.4 to 558.98)	939.53 (1461.4 to 558.98)	0 (0 to 0)
Seychelles	339.19 (520.95 to 199.36)	488.31 (761.36 to 282.49)	1272.72 (1964.77 to 743.32)	1272.72 (1964.77 to 743.32)	0 (0 to 0)
Sierra Leone	15467.55 (23198.99 to 9369.01)	36731.57 (55151.77 to 22167.54)	1158.34 (1762.34 to 690.01)	1158.34 (1762.34 to 690.01)	0 (0 to 0)
Singapore	7389.88 (11173.65 to 4448.11)	12020.68 (18909.58 to 6960.42)	605.25 (912.41 to 367.78)	688.71 (1059.39 to 406.14)	0.42 (0.42 to 0.42)
Slovakia	17175.04 (26752.69 to 10237.11)	15772.38 (24790.63 to 9255.1)	939.53 (1461.4 to 558.98)	939.53 (1461.4 to 558.98)	0 (0 to 0)
Slovenia	6436.97 (10066.71 to 3807.61)	5659.37 (8883.7 to 3319.9)	939.53 (1461.4 to 558.98)	939.53 (1461.4 to 558.98)	0 (0 to 0)
Solomon Islands	1420.66 (2159.39 to 863.6)	2928.02 (4485.34 to 1760.73)	1170.48 (1808.68 to 695.6)	1170.48 (1808.68 to 695.6)	0 (0 to 0)
Somalia	20591.3 (31332.46 to 12478.79)	55406.22 (84563.48 to 33331.33)	722.15 (1118.53 to 426.82)	722.15 (1118.53 to 426.82)	0 (0 to 0)
South Africa	139105.97 (199136.74 to 90379.65)	218853.16 (315199.99 to 141377.22)	1058.99 (1523.24 to 684.58)	1058.99 (1523.24 to 684.58)	0 (0 to 0)
South Sudan	15455.07 (23604.55 to 9275.36)	24612.57 (37431.73 to 14840.67)	722.15 (1118.53 to 426.82)	722.15 (1118.53 to 426.82)	0 (0 to 0)
Spain	159358.09 (246782.1 to 95299.68)	153518.26 (239333.61 to 90335.95)	1202.18 (1857.18 to 722.62)	1202.16 (1859.05 to 721.68)	0 (0 to 0)
Sri Lanka	81552.81 (125302.98 to 47931.26)	93255.69 (144242.91 to 54236.19)	1272.72 (1964.77 to 743.32)	1272.72 (1964.77 to 743.32)	0 (0 to 0)
Sudan	73582.71 (109309.7 to 45350.96)	173249.72 (258978.64 to 105819.3)	1044.41 (1580.74 to 627.98)	1044.41 (1580.74 to 627.98)	0 (0 to 0)
Suri0me	1355.04 (2061.12 to 820.44)	1875.91 (2870.36 to 1127.65)	946.47 (1447.43 to 570.34)	946.47 (1447.43 to 570.34)	0 (0 to 0)
Sweden	31447.65 (45394.6 to 20142.12)	36264.13 (52595.75 to 23426.78)	1186.74 (1701.97 to 767.28)	1191.59 (1717.2 to 775.29)	0.01 (0.01 to 0.01)
Switzerland	24944.87 (38939.33 to 14667.74)	28642.58 (44569.21 to 16811.42)	1096.2 (1691.9 to 655.63)	1105.79 (1699 to 657.58)	0.03 (0.01 to 0.04)
Syrian Arab Republic	48749.85 (72221.95 to 30146.9)	51497.18 (77220.25 to 31146.06)	1044.41 (1580.74 to 627.98)	1044.41 (1580.74 to 627.98)	0 (0 to 0)
Taiwan (Province of Chi0)	71321.02 (108381.33 to 43504.51)	70830.96 (111651.71 to 40887)	914.5 (1391.09 to 556.47)	983.62 (1525.05 to 579.14)	0.24 (0.21 to 0.26)
Tajikistan	17641.99 (27194.8 to 10520.35)	35457.69 (55020.57 to 20998.47)	978.46 (1522.86 to 576.3)	978.46 (1522.86 to 576.3)	0 (0 to 0)
Thailand	283234.72 (435639.7 to 167273.02)	264914.75 (414322.7 to 152859.71)	1300.79 (2006.23 to 765.67)	1303.32 (2017.45 to 765.15)	0.01 (0.01 to 0.01)
Timor-Leste	3561.08 (5451.75 to 2099.51)	6477.18 (9869.91 to 3814.31)	1272.72 (1964.77 to 743.32)	1272.72 (1964.77 to 743.32)	0 (0 to 0)
Togo	14109.34 (20938.72 to 8636.98)	34718.23 (52010.89 to 21019.49)	1158.34 (1762.34 to 690.01)	1158.34 (1762.34 to 690.01)	0 (0 to 0)
Tokelau	6.11 (9.34 to 3.69)	5.75 (8.82 to 3.45)	1170.48 (1808.68 to 695.6)	1170.48 (1808.68 to 695.6)	0 (0 to 0)
Tonga	407.55 (619.48 to 247.35)	420.41 (643.26 to 252.87)	1170.48 (1808.68 to 695.6)	1170.48 (1808.68 to 695.6)	0 (0 to 0)
Trinidad and Tobago	4136.23 (6292.23 to 2515.22)	4278 (6606.52 to 2546.3)	946.47 (1447.43 to 570.34)	946.47 (1447.43 to 570.34)	0 (0 to 0)
Tunisia	32121.92 (48077.41 to 19582.4)	41233.13 (62688.57 to 24690.63)	1044.41 (1580.74 to 627.98)	1044.41 (1580.74 to 627.98)	0 (0 to 0)
Turkey	214421.66 (323740.46 to 133450.78)	287665.5 (441171.12 to 172013.43)	988.03 (1508.42 to 606.14)	990.79 (1509.52 to 598.37)	0.03 (-0.03 to 0.09)
Turkmenistan	12534.27 (19362.78 to 7458.97)	18612.95 (29014.81 to 10948.04)	978.46 (1522.86 to 576.3)	978.46 (1522.86 to 576.3)	0 (0 to 0)
Tuvalu	34.71 (53.33 to 20.81)	54.16 (83.55 to 32.25)	1170.48 (1808.68 to 695.6)	1170.48 (1808.68 to 695.6)	0 (0 to 0)
Uganda	40351.57 (61480.66 to 24307.83)	109339.89 (166489.57 to 65900.04)	722.15 (1118.53 to 426.82)	722.15 (1118.53 to 426.82)	0 (0 to 0)
Ukraine	145790.81 (210964.37 to 93904.73)	113961.84 (165356.82 to 73223.18)	870.64 (1255.31 to 563.17)	870.64 (1255.31 to 563.17)	0 (0 to 0)
United Arab Emirates	9640.73 (14914.8 to 5708.26)	53455.49 (84105.95 to 31157)	1044.42 (1581.38 to 627.32)	1044.42 (1584.24 to 627.97)	0 (0 to 0)
United Kingdom	210171.68 (306450.59 to 134196.49)	232844.09 (340588.78 to 149205.39)	1164.27 (1687.58 to 751.07)	1178.43 (1712.96 to 762.63)	0.04 (0.04 to 0.04)
United Republic of Tanzania	56269.52 (85135.19 to 33965.24)	139782.39 (212634 to 84510.95)	673.5 (1036.93 to 398.3)	697.94 (1077.08 to 415.3)	0.12 (0.09 to 0.15)
United States Virgin Islands	922384.96 (1319222.33 to 591333.42)	1072518.71 (1564802.44 to 687452.49)	1080.1 (1538.29 to 695.87)	1070.51 (1555.23 to 690.39)	-0.04 (-0.14 to 0.05)
United States of America	349.17 (530.9 to 211.87)	216.92 (334.63 to 128.55)	946.47 (1447.43 to 570.34)	946.47 (1447.43 to 570.34)	0 (0 to 0)
Uruguay	8413.77 (13037.99 to 4960.48)	8740.36 (13617.66 to 5106.04)	821.56 (1273.67 to 484.24)	821.56 (1273.67 to 484.24)	0 (0 to 0)
Uzbekistan	70109.01 (108289.41 to 41740.51)	116552.13 (181900.06 to 68542.08)	978.46 (1522.86 to 576.3)	978.46 (1522.86 to 576.3)	0 (0 to 0)
Vanuatu	621.35 (947.2 to 376.67)	1308.48 (2005.87 to 785.9)	1170.48 (1808.68 to 695.6)	1170.48 (1808.68 to 695.6)	0 (0 to 0)
Venezuela (Bolivarian Republic of)	58280.75 (87209.15 to 36157.52)	73815.13 (111884.35 to 44494.37)	832.14 (1258.67 to 508.11)	853.18 (1290.68 to 514.05)	0.08 (0.08 to 0.08)
Viet 0m	300885.46 (459057.06 to 178313.86)	445622.14 (692263.47 to 259567.33)	1272.72 (1964.77 to 743.32)	1272.72 (1964.77 to 743.32)	0 (0 to 0)
Yemen	49914.05 (73385.14 to 31303.04)	133901.43 (199489.97 to 82446.92)	1044.41 (1580.74 to 627.98)	1044.41 (1580.74 to 627.98)	0 (0 to 0)
Zambia	21040.7 (32028.62 to 12482.35)	55439.96 (84836.43 to 32757.89)	785.8 (1217.46 to 457.45)	785.8 (1217.46 to 457.45)	-0.01 (-0.01 to -0.01)
Zimbabwe	35561.79 (53547.23 to 21410.57)	55112.17 (83497.83 to 32992)	1007.28 (1546.21 to 594.65)	1007.28 (1546.21 to 594.65)	0 (0 to 0)

## Sheet: TS5
Numbers and ASR per 100 000 cases of DALYs of migraine among 10-59 Male in 1990 and 2021, along with AAPC in ASR per 100 000 cases from 1990 to 2021, categorized by 204 countries.
Location	DALYs cases		DALYs rates
	1990(95% UI)	2021(95% UI)	1990_per 100 000(95% UI)	2021_per 100 000(95% UI)	AAPC(95% CI)
Afghanistan	15989.69 (37456.05 to 2287.56)	60020.72 (139415.71 to 8824.19)	571.92 (1301.11 to 95.62)	576.68 (1308.56 to 97.92)	0.03 (0.02 to 0.04)
Albania	5497.93 (12575.4 to 989.01)	4372.25 (9857.43 to 873.86)	474.56 (1074.7 to 90.92)	475.22 (1080.05 to 90.2)	0.01 (-0.01 to 0.02)
Algeria	48786.79 (113317.51 to 7144.04)	91477.15 (207314.7 to 15912.99)	590.11 (1341.55 to 100.53)	590.75 (1343.98 to 100.81)	0 (-0.01 to 0.01)
American Samoa	89.79 (211.1 to 9.77)	97.69 (229.61 to 11.76)	552.82 (1287.8 to 65.39)	550.03 (1295.98 to 64.92)	-0.01 (-0.03 to 0.01)
Andorra	131.23 (311.85 to 14.97)	182.68 (425.03 to 24.62)	577.38 (1373.92 to 64.91)	576.43 (1371.69 to 64.66)	-0.01 (-0.02 to 0)
Angola	15110.15 (34827.99 to 2028.66)	45719.35 (106481.69 to 6145.35)	484.26 (1103.57 to 72.1)	486.47 (1115.09 to 73.56)	0.02 (0.01 to 0.03)
Antigua and Barbuda	98.85 (232.64 to 11.68)	156.38 (364.56 to 21.44)	490.87 (1146.05 to 63.58)	490.49 (1152.2 to 62.91)	0 (-0.01 to 0)
Argentina	44918.89 (104008.08 to 8146.06)	67882.31 (155859.66 to 12688.09)	415.97 (960.52 to 76.65)	427.83 (985.44 to 78.44)	0.09 (0.07 to 0.12)
Armenia	5466.43 (12695.46 to 850.96)	4789.81 (10971.28 to 819.74)	475.64 (1096.38 to 76.59)	477.86 (1103.42 to 78.49)	0.02 (0 to 0.03)
Australia	30321.19 (71513.74 to 4943.68)	42976.75 (98699.43 to 7009.94)	502.31 (1187.52 to 80.74)	503.73 (1170.87 to 76.87)	0.01 (0 to 0.01)
Austria	14932.48 (35160.81 to 2074.65)	16419.5 (38072.61 to 2467.17)	545 (1289.01 to 72.67)	545.5 (1288.41 to 72.15)	0 (-0.03 to 0.02)
Azerbaijan	11569.24 (26864.95 to 1778.15)	18901.87 (43614.23 to 3161.23)	478.49 (1099.79 to 78.9)	478.99 (1114.57 to 77.53)	0 (-0.01 to 0.02)
Bahrain	454.21 (1073.78 to 53.06)	690.47 (1615.35 to 90.47)	492.37 (1152.2 to 63.74)	489.37 (1149.37 to 61.82)	-0.02 (-0.03 to -0.01)
Bangladesh	1356.09 (3066.91 to 229.29)	4818.34 (10765.84 to 888.18)	591.26 (1345.22 to 100.35)	589.31 (1347.8 to 98.88)	-0.01 (-0.02 to 0)
Barbados	190842.74 (457910.01 to 16928.16)	319827.12 (765726.36 to 31044.13)	562.47 (1331.94 to 55.77)	563.89 (1347.12 to 56.05)	0.01 (-0.01 to 0.03)
Belarus	426.37 (995.41 to 51.86)	476.99 (1102.97 to 67.06)	493.09 (1145.9 to 63.65)	491.93 (1149.7 to 62.48)	-0.01 (-0.01 to 0)
Belgium	15696.06 (35288.87 to 3804.02)	13976.03 (30719.11 to 3567.68)	443.54 (1002.25 to 104.9)	444.59 (999.56 to 103.27)	0 (-0.01 to 0.02)
Belize	23108.08 (54452.61 to 2402.89)	25419.88 (59431.72 to 2690.02)	665.13 (1578.36 to 65.39)	691.32 (1636.39 to 65.12)	0.13 (0.1 to 0.16)
Benin	295.27 (707.32 to 30.45)	766.07 (1815.22 to 92.02)	492.7 (1158.37 to 61.14)	489.39 (1151.83 to 62.38)	-0.02 (-0.03 to -0.01)
Bermuda	7167.81 (17296.57 to 788.08)	23255.49 (55740.1 to 2611.71)	572.42 (1352.4 to 72.26)	577.67 (1362.88 to 73.93)	0.03 (0.01 to 0.05)
Bhutan	106.55 (245.3 to 14.04)	96.84 (223.54 to 15)	493.54 (1141.46 to 62.14)	493.3 (1163.88 to 63.43)	0 (0 to 0)
Bolivarian Republic of Venezuela	1249.36 (3024.19 to 105.02)	1698.87 (4051.15 to 165.28)	564.58 (1343.68 to 55.33)	567.66 (1350.69 to 56.62)	0.02 (0.02 to 0.03)
Bosnia and Herzegovina	7263.38 (16933.19 to 1068.12)	15179.87 (35542.46 to 2482.74)	362.23 (827.76 to 60.82)	362.84 (844.99 to 61.59)	0 (-0.02 to 0.01)
Botswana	7980.54 (18147.86 to 1542.16)	5308.37 (11864.2 to 1137.44)	473.25 (1076.01 to 91.03)	473.59 (1080.61 to 91.53)	0 (-0.02 to 0.02)
Brazil	1832.66 (4280.11 to 240.82)	4272.97 (9810.1 to 614.47)	487.92 (1114.8 to 73.13)	484.73 (1109.16 to 71.68)	-0.02 (-0.03 to -0.01)
Brunei Darussalam	325342.31 (774431.99 to 27866.69)	490447.6 (1146259.1 to 48613.39)	620.75 (1460.36 to 60.39)	647.86 (1523.6 to 59.94)	0.16 (0.08 to 0.24)
Bulgaria	376.86 (873.36 to 73.63)	729.29 (1661.76 to 160.26)	379.72 (866.64 to 81.36)	379.06 (868.27 to 81.44)	0 (-0.01 to 0.01)
Burkina Faso	14179.96 (32065.17 to 2860.04)	10708.2 (23930.04 to 2369.21)	472.76 (1080.6 to 89.88)	474.08 (1084.85 to 92.69)	0.02 (0.01 to 0.03)
Burundi	14095.31 (33663.63 to 1558.06)	37739.67 (89054.97 to 4276.91)	571.3 (1336 to 72.15)	580.2 (1351.14 to 74.42)	0.05 (0.03 to 0.06)
Cambodia	5397.58 (12574 to 953.06)	14429.04 (33591.99 to 2540.77)	353.3 (806.68 to 69.63)	352.14 (805.97 to 68.07)	-0.01 (-0.02 to 0)
Cameroon	540.82 (1297.18 to 59.12)	1247.76 (2929.54 to 157.99)	579.85 (1361.82 to 75.56)	578.85 (1356.84 to 74.64)	-0.01 (-0.02 to 0)
Canada	16947.67 (40261.14 to 1562.89)	36757.17 (86708.09 to 3860.84)	605.18 (1416.71 to 63.44)	612.42 (1440.49 to 66.85)	0.04 (0.03 to 0.05)
Central African Republic	16871.75 (40505 to 1942.41)	58347.87 (139274.83 to 6550.99)	572.72 (1352.01 to 74.67)	576.45 (1355.36 to 73.22)	0.03 (0.02 to 0.04)
Chad	45348.95 (103247.52 to 7808.05)	55603.51 (125433.49 to 10162.62)	459.27 (1051.24 to 77.37)	458.91 (1047.4 to 76.78)	0 (0 to 0.01)
Chile	3816.2 (8893.96 to 522.61)	8318.36 (19122.6 to 1162.21)	477.78 (1095.9 to 73.33)	483.79 (1098.52 to 74.08)	0.04 (0.02 to 0.06)
China	9120.06 (21834.8 to 1047.31)	28027.76 (67216.15 to 3135.76)	573.97 (1349.49 to 75.32)	575.5 (1355.88 to 75.16)	0.01 (0 to 0.02)
Colombia	17100.83 (38635.81 to 3345.17)	25863.42 (57818.67 to 5418.63)	376.8 (843.61 to 77.52)	386.01 (870.21 to 77.95)	0.08 (0.05 to 0.11)
Commonwealth of the Bahamas	1822725.28 (4147023.33 to 319075.74)	2333112.55 (5188522.48 to 427739.93)	410.29 (926.88 to 74.43)	443.51 (1002.28 to 74.63)	0.26 (0.18 to 0.34)
Comoros	49580.07 (114373.23 to 6087.93)	79921.87 (186646.17 to 10868.68)	446.51 (1018.18 to 61.56)	458.34 (1072.62 to 61.53)	0.09 (0.07 to 0.11)
Congo	470.62 (1098.25 to 80.02)	926.88 (2125.97 to 172.38)	354.74 (812.84 to 67.46)	355.85 (810.61 to 68.92)	0.01 (0 to 0.03)
Cook Islands	3490.75 (8108.75 to 461.15)	9078.48 (20800.79 to 1296.49)	486.77 (1108.78 to 73.24)	488.25 (1110.44 to 73.15)	0.01 (-0.01 to 0.03)
Costa Rica	36.51 (86.78 to 4.08)	31.22 (72.57 to 3.96)	554.44 (1306.11 to 65.93)	551.56 (1292.93 to 65.7)	-0.02 (-0.04 to 0.01)
Croatia	4633.94 (10905.02 to 552.38)	7353.08 (17076.89 to 1026.07)	450.56 (1046.84 to 61.04)	449 (1047.12 to 60.65)	-0.01 (-0.03 to 0)
Cuba	21405.53 (50719.99 to 2435.59)	54035.68 (127950.43 to 6273.25)	568.92 (1329.99 to 73.36)	576.96 (1349.79 to 73.21)	0.05 (0.04 to 0.06)
Cyprus	8379.6 (18912.07 to 1684.64)	6575.62 (14466.11 to 1399.05)	474.5 (1082.67 to 90.27)	473.72 (1061.43 to 91.06)	0.03 (-0.08 to 0.14)
Czech Republic	19750.56 (46374.46 to 2432.57)	18726.3 (43079.76 to 2779.06)	492.22 (1153.9 to 63.21)	491.73 (1150.52 to 63.05)	0 (-0.01 to 0.01)
Democratic People's Republic of Korea	1595.96 (3795.3 to 179.88)	2750.58 (6485.64 to 336.98)	578.35 (1374.9 to 65.82)	578.57 (1379.27 to 65.14)	0 (0 to 0.01)
Democratic Republic of the Congo	17123.92 (39117.68 to 3297.3)	16995.84 (38163.46 to 3722.79)	473.38 (1087.91 to 88.13)	474.86 (1093.63 to 91.96)	0.01 (-0.01 to 0.03)
Denmark	30036.83 (69566.77 to 4416.02)	44643.51 (103249.01 to 6919)	434.82 (1006.95 to 64.07)	434.51 (1012.29 to 63.53)	0 (-0.01 to 0.02)
Djibouti	52416.22 (120862.84 to 6848.2)	141582.89 (326680.5 to 19494.18)	479.34 (1088.49 to 71.04)	485.74 (1103.58 to 74.12)	0.05 (0.03 to 0.06)
Dominica	9211.03 (21226.01 to 1309.75)	9767.52 (22909.42 to 1433.89)	501.89 (1164.56 to 67.5)	515.31 (1220.9 to 68.5)	0.08 (0.05 to 0.1)
Dominican Republic	502.43 (1173.87 to 85.61)	1734.04 (3974.98 to 328.41)	355.89 (815.47 to 67.05)	356.12 (810.89 to 69.81)	-0.01 (-0.02 to 0.01)
Ecuador	120.66 (286.8 to 13.35)	120.31 (279.58 to 16.25)	491.98 (1150.15 to 62.31)	489.25 (1142.79 to 63.02)	-0.02 (-0.02 to -0.01)
Egypt	11620.41 (27505.13 to 1308.2)	19370.63 (45133.47 to 2492.74)	491.02 (1145.48 to 63.83)	489.56 (1141.51 to 63.25)	-0.01 (-0.02 to 0.01)
El Salvador	13403.63 (31292.43 to 1862.49)	26389.74 (61518.13 to 3857.91)	402.48 (928.32 to 64.02)	417.53 (970.67 to 62.68)	0.11 (0.09 to 0.14)
Equatorial Guinea	112120.01 (257077.55 to 17027.11)	224931.5 (518419.64 to 35984.65)	595.74 (1347.82 to 99.96)	595.26 (1362.04 to 99.77)	0 (-0.03 to 0.02)
Eritrea	7429.98 (17791.39 to 868.74)	9293.13 (21807.08 to 1187.82)	441.16 (1035.89 to 61.28)	446.44 (1039.1 to 60.87)	0.04 (0.02 to 0.05)
Estonia	541.18 (1249.3 to 75)	2762.47 (6480.59 to 352.92)	480.63 (1091.51 to 73.81)	487.46 (1115.32 to 73.42)	0.05 (0.04 to 0.06)
Ethiopia	3451.03 (8076.32 to 608.07)	7998.28 (18297.59 to 1436.91)	346.02 (793.19 to 68.85)	351.1 (792.18 to 68.04)	0.05 (0.02 to 0.08)
Federated States of Micronesia	2358.4 (5207.72 to 578.72)	1931.57 (4231.42 to 490.7)	442.54 (985.26 to 104.86)	444.78 (995.5 to 102.95)	0.02 (0.01 to 0.03)
Fiji	1070.73 (2501.38 to 138.43)	1886.27 (4347.28 to 259.68)	491.03 (1123.61 to 73.55)	481.35 (1093.89 to 72.76)	-0.06 (-0.08 to -0.04)
Finland	44889.57 (104675.54 to 7743.34)	111760.72 (265080.45 to 17109.82)	321.1 (734.46 to 61.27)	318.93 (742.29 to 54.2)	-0.02 (-0.03 to -0.01)
France	1447.33 (3415.07 to 158.43)	1824.13 (4264.36 to 212.2)	550.95 (1286.79 to 65.26)	551.85 (1290.8 to 63.86)	0 (-0.01 to 0.01)
Gabon	10264.79 (24218.09 to 1283.52)	9952.25 (23366.9 to 1251.42)	574.81 (1368.39 to 66.89)	575.37 (1367.06 to 65.23)	0 (-0.01 to 0.02)
Georgia	122209.23 (285855.78 to 15856.36)	124712.88 (286898.61 to 17367.76)	613.3 (1440.94 to 76.73)	606.26 (1408.78 to 76.23)	-0.05 (-0.13 to 0.04)
Germany	1460.94 (3369.92 to 198.47)	2872.48 (6624.44 to 418.8)	486.99 (1106.41 to 73.22)	487.37 (1114.21 to 75.1)	0.01 (-0.02 to 0.04)
Ghana	1680.51 (3998.22 to 193.83)	4372.93 (10431.1 to 512.06)	579.58 (1359.92 to 76.1)	577.9 (1356.6 to 76.42)	-0.01 (-0.02 to 0.01)
Greece	8796.89 (20297.55 to 1481.48)	5568.36 (12746.36 to 978.4)	476.49 (1100.97 to 79.29)	474.72 (1100.43 to 77.25)	-0.01 (-0.04 to 0.01)
Greenland	170222.61 (400022.06 to 21352.82)	169390.95 (397233.7 to 22147.81)	596.09 (1412.71 to 68.96)	615.43 (1463.56 to 69.91)	0.08 (0.01 to 0.15)
Grenada	25702.13 (61398.31 to 2935.34)	63991.56 (151883.45 to 7555.51)	575.17 (1352.42 to 73.9)	577.84 (1353.73 to 74.82)	0.02 (0 to 0.04)
Guam	21829.15 (52389.85 to 2415.29)	19268.98 (45513.77 to 2391.28)	612.14 (1474.91 to 64.44)	606.33 (1451.57 to 64.49)	-0.03 (-0.05 to -0.01)
Guatemala	116.27 (264.95 to 18.49)	99.06 (224.71 to 17.37)	482.84 (1100.54 to 77.59)	481.08 (1106.53 to 77.66)	-0.01 (-0.02 to 0)
Guinea	133.18 (315.04 to 14.57)	189.72 (441.72 to 24.77)	490.05 (1141.69 to 62.6)	490.3 (1147.98 to 61.24)	0 (-0.01 to 0)
Guinea-Bissau	301.09 (712.39 to 32.52)	306.79 (713.82 to 37.16)	557.18 (1308.67 to 63.7)	555.02 (1297.2 to 64.57)	-0.01 (-0.02 to 0)
Guyana	10906.3 (26020.74 to 1273.12)	24083.6 (56780.17 to 2987.81)	441.96 (1029.64 to 61.91)	444.84 (1035.39 to 61.18)	0.02 (0.01 to 0.03)
Haiti	9244.66 (22085.78 to 1097.59)	22163.87 (53081.66 to 2502.69)	575.08 (1356.59 to 75.36)	578.38 (1360.61 to 74.44)	0.02 (0.01 to 0.02)
Honduras	1585.87 (3801.76 to 177.69)	3635.42 (8588.42 to 418.45)	572.13 (1345.12 to 75.26)	576.79 (1338.76 to 75.67)	0.03 (0.01 to 0.05)
Hungary	1289.05 (3034.49 to 143.09)	1290.94 (3009.15 to 159.94)	484.25 (1124.04 to 62.56)	482.25 (1121.41 to 61.01)	-0.02 (-0.03 to 0)
Iceland	9432.78 (22310.06 to 1059.34)	21578.69 (49848.08 to 2574.32)	483.6 (1129.09 to 61.7)	487.2 (1118.16 to 62.73)	0.03 (0.01 to 0.04)
India	6398.67 (15294.27 to 720.44)	15574.53 (36736.75 to 1912.42)	447.43 (1041.84 to 61.41)	447.75 (1044.38 to 61.23)	0 (-0.02 to 0.01)
Indonesia	16956.78 (38197.28 to 3408.35)	15226.7 (34146.18 to 3198.79)	472.28 (1074.07 to 91.14)	476.13 (1093.6 to 89.73)	0.02 (0.01 to 0.04)
Iraq	517.04 (1230.58 to 57.89)	690.86 (1626.04 to 82.49)	577.56 (1373.17 to 65.88)	578.35 (1373.53 to 64.47)	0.01 (0 to 0.01)
Ireland	1652837.13 (3828663.51 to 173808.52)	3051700.29 (7037116.74 to 333956.7)	565.75 (1303.42 to 63.54)	571.68 (1316.02 to 63.98)	0.06 (-0.04 to 0.15)
Islamic Republic of Iran	394976.61 (913882.95 to 41546.16)	682701.57 (1568248.76 to 78906.71)	638.53 (1466.13 to 72.93)	642.31 (1478.63 to 72.78)	0.02 (0.01 to 0.02)
Israel	115003.55 (261848 to 18814.28)	205640.19 (449753.98 to 41064.63)	639.82 (1424.16 to 119.82)	635.52 (1407.02 to 120.05)	-0.04 (-0.05 to -0.02)
Italy	35071.59 (81875.1 to 4993.79)	91030.7 (210063.41 to 14504.4)	579.57 (1321.78 to 96.3)	583.81 (1335.91 to 97.3)	0.02 (0.01 to 0.03)
Jamaica	7042.94 (16710.03 to 797.49)	9422.86 (22515.19 to 1163.32)	575.14 (1361.82 to 66.65)	574.48 (1385.85 to 64.1)	0 (0 to 0.01)
Japan	9433.78 (22745.87 to 1011.44)	18085.49 (42803.84 to 2089.04)	580.19 (1391.6 to 65.54)	579.17 (1373.2 to 65.82)	0 (0 to 0.01)
Jordan	124083.39 (288552.05 to 14076.37)	118696.05 (272113.48 to 14680.18)	624.76 (1457.59 to 67.51)	630.48 (1470.89 to 65.99)	0.01 (-0.17 to 0.2)
Kazakhstan	3829.25 (9001.2 to 414.13)	5028.06 (11771.32 to 652.58)	493.43 (1142.03 to 61.32)	491.6 (1152.88 to 63.28)	-0.01 (-0.02 to 0)
Kenya	165909.59 (374935.18 to 43292.57)	148506 (330064.88 to 38623.3)	359.24 (825.21 to 88.06)	381.95 (875.18 to 88.28)	0.2 (0.19 to 0.22)
Kingdom of Eswatini	7698.33 (18141.39 to 1124.02)	29711.62 (67934.3 to 4854.24)	591.89 (1356.73 to 101)	592.11 (1347.7 to 99.2)	0 (0 to 0)
Kiribati	26233.23 (60970.27 to 4080.5)	30519.59 (69523.68 to 5110.33)	474.61 (1095.6 to 77.43)	475.42 (1087.91 to 78.34)	0.01 (0 to 0.01)
Kuwait	24377.4 (56457.39 to 4296.87)	62977.41 (144965.45 to 11512.5)	377.69 (852.06 to 75.42)	378.35 (854.98 to 74.92)	0.01 (0 to 0.02)
Kyrgyzstan	128.62 (300.02 to 13.51)	223.18 (527.96 to 24.34)	546.55 (1259.79 to 63.21)	551.57 (1297.03 to 63.65)	0.03 (0.02 to 0.04)
Lao People's Democratic Republic	4589.66 (10429.87 to 691.45)	11873.47 (26905.29 to 1907.34)	602.7 (1371.71 to 90.34)	590.86 (1362.87 to 84.44)	-0.06 (-0.07 to -0.05)
Latvia	6642.54 (15699.71 to 982.45)	11034.87 (25610.66 to 1749.61)	475.08 (1104.8 to 76.66)	476.57 (1100.21 to 78.18)	0.01 (-0.01 to 0.03)
Lebanon	7342.01 (17319.09 to 703.13)	16269.71 (38342.14 to 1663.7)	607.95 (1421.43 to 64.31)	613.38 (1440.79 to 65.12)	0.03 (0.01 to 0.04)
Lesotho	3970.74 (8806.72 to 989.4)	2663.37 (5795.41 to 697.6)	441.94 (990.92 to 105.33)	444.82 (991.9 to 105.3)	0.02 (-0.01 to 0.05)
Liberia	5670.76 (13022.19 to 898.86)	11763.67 (26781.78 to 1987.18)	584.66 (1326.59 to 99.14)	585.25 (1339.13 to 97.14)	0 (-0.02 to 0.02)
Libya	1921.06 (4512.76 to 259.61)	3079.77 (7101.84 to 426.93)	488.85 (1124.59 to 74.26)	479.24 (1090.66 to 72.85)	-0.06 (-0.08 to -0.05)
Lithuania	4010 (9586.36 to 469.61)	10583.06 (25053.35 to 1229.26)	564.07 (1328.51 to 73.82)	568.84 (1332.35 to 72.19)	0.03 (0.02 to 0.04)
Luxembourg	8711.18 (20206.54 to 1274.79)	16465.93 (37291.38 to 2900.89)	590.68 (1336.43 to 98.12)	586.51 (1341.38 to 98.72)	-0.03 (-0.04 to -0.01)
Madagascar	4906.86 (10954.8 to 1168.76)	3470.72 (7579.21 to 898.18)	391.59 (877.21 to 91.69)	393.9 (878.23 to 92.47)	-0.01 (-0.04 to 0.03)
Malawi	800.09 (1867.77 to 110.16)	1349.02 (3098.09 to 200.09)	578.02 (1364.93 to 74.38)	580.71 (1356.06 to 76.16)	0.02 (0 to 0.04)
Malaysia	12092.21 (28019.56 to 2040.71)	31959.01 (74262.7 to 5635.31)	351.33 (799.87 to 66.5)	354.61 (811.13 to 68.37)	0.03 (0.01 to 0.05)
Maldives	9826.46 (22971.55 to 1706.66)	21447.66 (50414.09 to 3771.13)	352.13 (805.99 to 68.15)	354.61 (816.14 to 69.85)	0.03 (0.01 to 0.04)
Mali	34545.16 (81078.35 to 3537.51)	73247.41 (171263.73 to 7959.41)	580.92 (1350.94 to 64.19)	592.8 (1387.8 to 64.56)	0.07 (0.06 to 0.08)
Malta	399.69 (942.46 to 37.15)	1742.6 (4053.16 to 188.4)	612.7 (1431.02 to 63.45)	615.32 (1443.55 to 64.52)	0.02 (0 to 0.04)
Marshall Islands	13566.45 (32673.3 to 1589.34)	39702.24 (94253.85 to 4415.44)	572.89 (1356.27 to 74.84)	576.6 (1344.74 to 74.05)	0.02 (0.01 to 0.03)
Mauritania	758.48 (1819.71 to 89.25)	813.18 (1915.15 to 105.1)	578.21 (1393.06 to 65.99)	577.3 (1379.12 to 66.08)	0 (-0.01 to 0)
Mauritius	75.91 (181.39 to 7.58)	114.55 (269.45 to 13.08)	552.22 (1300.95 to 63.74)	549.85 (1288.88 to 64.65)	-0.01 (-0.01 to -0.01)
Mexico	3452 (8151.14 to 390.52)	7727.7 (18495.31 to 906.46)	577.87 (1349.63 to 73.43)	580.43 (1367.15 to 76.25)	0.01 (0.01 to 0.02)
Mongolia	2440.84 (5774.63 to 249.94)	2799.5 (6520.84 to 323.61)	610.41 (1438.4 to 66.46)	608.93 (1427.88 to 65.4)	0 (-0.01 to 0)
Montenegro	126460.48 (293231.38 to 16429.91)	210390.83 (482593.96 to 31029.03)	448.91 (1020.69 to 68.06)	462.63 (1061.92 to 67.77)	0.1 (0.09 to 0.11)
Morocco	177.35 (420.32 to 18.54)	206.67 (482.86 to 22.76)	550.98 (1288.29 to 65.21)	551.68 (1281.88 to 62.92)	0 (-0.01 to 0.02)
Mozambique	55.19 (128.55 to 7.12)	62.88 (147.59 to 8.37)	578.14 (1367.27 to 65.51)	576.77 (1378.63 to 64.34)	0 (-0.01 to 0)
Myanmar	3194.51 (7541.71 to 452.11)	5446.19 (12568.73 to 892.93)	475.04 (1098.7 to 77)	473.39 (1095.16 to 77.2)	-0.01 (-0.02 to 0)
Namibia	1064.56 (2433.05 to 203.99)	1015.58 (2292.57 to 209.57)	475.12 (1083.91 to 91.19)	475.76 (1088.67 to 91.34)	0 (-0.02 to 0.02)
Nepal	49240.53 (113841.29 to 7546.48)	77974.96 (176891.13 to 13354.21)	587.5 (1336.13 to 100.27)	587.68 (1335.76 to 99.6)	0 (-0.02 to 0.02)
Netherlands	12565.82 (29129.13 to 2317.38)	30958.58 (71618.67 to 5274.86)	349.18 (797.35 to 70.05)	351.63 (796.51 to 67.54)	0.03 (0 to 0.05)
New Zealand	80508.27 (190215.9 to 7863.29)	118576.1 (279161.81 to 12463.18)	608.08 (1425.35 to 65)	612.21 (1439.07 to 65.13)	0.02 (0 to 0.05)
Nicaragua	2054.35 (4735.73 to 278.37)	4005.76 (9164.12 to 564.19)	488.22 (1107.81 to 74.56)	485.63 (1100.04 to 73.09)	-0.02 (-0.04 to 0)
Niger	18.56 (44.21 to 2.06)	20.95 (49.5 to 2.19)	553.27 (1305.87 to 65.62)	551.49 (1287.66 to 62.21)	-0.01 (-0.01 to 0)
Nigeria	36132.06 (86416.44 to 3238.63)	62040.32 (148153.59 to 5874.39)	606.59 (1437.37 to 59.76)	609.53 (1443.32 to 61.08)	0.02 (0.02 to 0.03)
Northern Mariana Islands	27698.15 (65781.65 to 3345.06)	30042.37 (71725.27 to 3521.62)	505.43 (1208.44 to 58.78)	547.75 (1323.73 to 57.33)	0.24 (0.1 to 0.38)
Norway	6290.43 (14510.35 to 999.71)	9291.11 (21238.86 to 1570.86)	525.06 (1212.01 to 83.64)	528.35 (1218.92 to 85.09)	0.02 (-0.01 to 0.05)
Oman	5244.36 (12534.5 to 589.1)	10637.51 (24895.1 to 1424.04)	444.6 (1037.8 to 61.73)	448.07 (1042.63 to 63.6)	0.03 (0.02 to 0.03)
Pakistan	12598.12 (30008.23 to 1411.73)	39789.69 (95968.58 to 4409.52)	575.23 (1344.33 to 73.02)	579.85 (1362.36 to 76.58)	0.03 (0.02 to 0.04)
Palestine	169606.04 (393403.68 to 21357.85)	409160.77 (953906.99 to 49027.59)	605.27 (1389.63 to 82.23)	606.06 (1393.05 to 82.59)	0.01 (-0.01 to 0.03)
Panama	4.08 (9.66 to 0.46)	3.21 (7.47 to 0.39)	553.68 (1303.69 to 65.95)	551.44 (1291.07 to 63.94)	-0.01 (-0.03 to 0.01)
Papua New Guinea	3397.18 (7723.76 to 653.52)	3888.5 (8744.62 to 823.19)	475.32 (1080.62 to 91.53)	475.38 (1089.22 to 91.29)	0 (-0.02 to 0.02)
Paraguay	106.8 (249.66 to 12.23)	102.7 (238.99 to 12.85)	554.73 (1301.49 to 63.95)	553.61 (1299.63 to 64.65)	-0.01 (-0.03 to 0.01)
Peru	7862.8 (18187.17 to 946.72)	10777.42 (25321.19 to 1326.44)	532.1 (1234.25 to 62.52)	587.17 (1395.96 to 65.23)	0.31 (0.27 to 0.36)
Philippines	4936.07 (11285.87 to 803.84)	14241.9 (31866.94 to 2577.23)	589.78 (1341.23 to 99.66)	590.51 (1343.19 to 99.08)	0.01 (-0.01 to 0.02)
Plurinational State of Bolivia	202526.67 (481963.59 to 17239.11)	463668.04 (1105320.42 to 33632.03)	578.88 (1364.8 to 55.11)	565.81 (1341.66 to 44.06)	-0.08 (-0.13 to -0.03)
Poland	31.53 (74.17 to 3.47)	42.54 (97.92 to 5.55)	553.34 (1289.58 to 65.43)	551.27 (1285.93 to 64.65)	-0.01 (-0.02 to -0.01)
Portugal	3633.7 (8685.08 to 514.91)	10784.66 (24919.62 to 1678.69)	587.06 (1348.93 to 100.01)	583.65 (1328.54 to 99.49)	-0.01 (-0.03 to 0.01)
Principality of Monaco	3775.02 (8793.04 to 458.83)	6762.62 (15923.69 to 918.06)	450.3 (1038.32 to 60.87)	449.78 (1059.52 to 61.02)	-0.01 (-0.02 to 0.01)
Puerto Rico	7425.58 (17465.03 to 799.51)	19927.56 (46568.38 to 2233.7)	547.71 (1272.17 to 65.03)	550.17 (1277.1 to 65.35)	0.02 (0.01 to 0.02)
Qatar	8195.02 (19643.85 to 630.36)	15837.85 (37906.82 to 1375.29)	603.39 (1429.65 to 54.23)	600.05 (1431.13 to 54.26)	0 (-0.01 to 0)
Republic of Cabo Verde	20858.12 (49631.92 to 3882.98)	41727.43 (96814.14 to 8036.87)	292.62 (682.92 to 61)	321.25 (744.26 to 62.41)	0.32 (0.28 to 0.36)
Republic of C么te d'Ivoire	129962.66 (301779.52 to 13323.68)	262890.41 (609417.24 to 28762.48)	635.39 (1459.68 to 72.14)	639.29 (1477.02 to 72.23)	0.02 (0.02 to 0.02)
Republic of Korea	65957.27 (147210.25 to 13210.12)	65468.17 (143792.61 to 14151.3)	499.47 (1119.36 to 98.03)	502.35 (1126.03 to 99.01)	0.02 (0.01 to 0.02)
Republic of Moldova	19646.19 (46586.78 to 2241.54)	18817.66 (43994.5 to 2461.92)	572.23 (1357.68 to 64.27)	574.74 (1364.51 to 64.92)	0.02 (0 to 0.03)
Republic of Nauru	5943.38 (13958.29 to 740.46)	4956.84 (11439.94 to 700.17)	490.62 (1147.77 to 63.36)	490.96 (1146.81 to 62.74)	0 (-0.02 to 0.02)
Republic of Niue	1496.04 (3373.66 to 267.21)	11389.17 (25117.55 to 2162.65)	591.48 (1354.4 to 100.9)	589.54 (1339.37 to 100.04)	0 (-0.01 to 0)
Republic of Palau	75251.1 (175644.15 to 13585.63)	79877.93 (179840.14 to 17766.14)	436.38 (1009.16 to 83.07)	425.01 (985.4 to 82.6)	-0.09 (-0.18 to 0)
Republic of San Marino	6539.33 (14788.79 to 1550.68)	5748.8 (12650.12 to 1490.55)	444.56 (1004.53 to 106.11)	445.75 (1001.54 to 106)	0.01 (-0.01 to 0.03)
Republic of the Gambia	38579.43 (88457.55 to 7602.95)	30307.58 (67452.52 to 6547.94)	472.76 (1087.75 to 90.72)	475.73 (1084.03 to 91.9)	0.02 (0 to 0.04)
Romania	270565.48 (595704.43 to 67896.62)	253450.35 (549920.29 to 67422.41)	518.16 (1147.72 to 126.77)	520.93 (1153.69 to 127.36)	0.01 (-0.04 to 0.05)
Russian Federation	7067.67 (16505.76 to 1239.47)	15178.27 (35159.42 to 2647.07)	352.73 (803.35 to 69.87)	353.28 (806.19 to 67.15)	0.01 (-0.02 to 0.04)
Rwanda	65.38 (155.08 to 7.1)	107.02 (246.29 to 15.6)	489.55 (1144.68 to 61.81)	488.69 (1140.41 to 63.91)	0 (-0.01 to 0)
Saint Kitts and Nevis	217.63 (514.45 to 23.72)	316.08 (718.12 to 44.43)	489.93 (1139.62 to 63.1)	488.99 (1124.89 to 62.26)	0 (-0.01 to 0)
Saint Lucia	182.22 (429.52 to 19.5)	197.35 (458.45 to 27.09)	491.07 (1136.79 to 62.62)	488.62 (1142.39 to 63.2)	-0.01 (-0.02 to -0.01)
Saint Vincent and the Grenadines	304.98 (722.07 to 31.17)	389.95 (919.81 to 43.69)	551.28 (1281.65 to 65.04)	550.7 (1290.32 to 64.74)	0 (-0.02 to 0.01)
Samoa	48.88 (116.19 to 5.68)	57.76 (135.08 to 7.34)	578.34 (1377.66 to 64.88)	576.33 (1370.35 to 63.81)	-0.01 (-0.02 to 0)
Sao Tome and Principe	198.26 (477.22 to 21.59)	439.42 (1040.61 to 51.94)	580.2 (1363.72 to 73.48)	580.39 (1361.31 to 73.52)	0 (-0.02 to 0.02)
Saudi Arabia	37577.52 (86444.11 to 5617.85)	112516.15 (252913.25 to 19999.62)	603.41 (1373.61 to 98.07)	602.87 (1375.02 to 98.72)	-0.02 (-0.04 to 0.01)
Senegal	12079.27 (28748.21 to 1369.27)	29631.47 (70238.46 to 3449.73)	574.95 (1347.25 to 74.28)	578.41 (1351.58 to 75.59)	0.02 (0.01 to 0.04)
Serbia	16388.67 (36648.51 to 3303.29)	14910.56 (33299.13 to 3035.42)	476.43 (1073.31 to 92.65)	476.75 (1080 to 90.42)	0 (-0.02 to 0.02)
Seychelles	152.36 (359.36 to 14.91)	256.07 (604.82 to 29.12)	613.61 (1438.62 to 64.98)	612.42 (1457.41 to 65.29)	0 (-0.01 to 0.01)
Sierra Leone	6847.08 (16197.01 to 809.79)	16476.94 (39078.07 to 1879.22)	570.86 (1332.06 to 74.33)	575.94 (1344.59 to 73.47)	0.03 (0.02 to 0.05)
Singapore	3944.34 (8780.18 to 988.21)	7986.17 (17440.22 to 2099.19)	321.15 (710.13 to 82.8)	362.88 (820.76 to 83.4)	0.4 (0.37 to 0.44)
Slovakia	8627.78 (19666.8 to 1629.92)	9039.63 (20079.73 to 1942.15)	473.44 (1079.87 to 89.49)	475.67 (1077.46 to 91.75)	0.02 (0 to 0.04)
Slovenia	3391.11 (7745.96 to 670.19)	3297.56 (7291.39 to 715.17)	473.19 (1088.7 to 90.25)	475.73 (1081.2 to 90.88)	0.02 (0 to 0.03)
Socialist Republic of Viet Nam	575.94 (1369.9 to 58.37)	1275.63 (2996.25 to 141.43)	554.04 (1296.5 to 63.79)	553.69 (1288.95 to 65.34)	0 (0 to 0.01)
Solomon Islands	8437.32 (19667.42 to 1483.95)	22906.89 (52953.63 to 3903.33)	353.33 (805.87 to 69.56)	352.38 (796 to 68.96)	-0.01 (-0.02 to 0.01)
Somalia	61063.79 (140022.25 to 8895.07)	105174.62 (237229.36 to 16349.75)	512.86 (1159.5 to 82.01)	508.59 (1147.71 to 80.41)	-0.03 (-0.03 to -0.02)
South Africa	6484.41 (15109.96 to 1126.57)	10155.22 (23654.74 to 1793.56)	351.47 (803.24 to 67.47)	350.21 (801.54 to 67.9)	0 (-0.04 to 0.04)
South Sudan	79918.49 (191530.16 to 8100.88)	89829.31 (208459.75 to 11316.35)	593.55 (1422.01 to 59.74)	600.65 (1418.63 to 64.43)	0.04 (0.01 to 0.08)
Spain	37016.66 (87400.14 to 3705.12)	45900.88 (107449.34 to 4960.55)	610.66 (1435.07 to 64.45)	609.34 (1428.93 to 63.92)	0 (-0.01 to 0.01)
Sri Lanka	36430.05 (85042.79 to 5230.28)	89044.79 (208402.5 to 13145.51)	587.52 (1340.32 to 97.91)	588.12 (1351.43 to 97.19)	0 (0 to 0.01)
Sudan	668.03 (1579.26 to 76.8)	980.17 (2287.22 to 130.63)	490.17 (1147.35 to 63.19)	487.12 (1140.12 to 63.01)	-0.02 (-0.03 to -0.01)
Suriname	16451.8 (38217.68 to 1989.75)	19112.22 (44640.06 to 2367.33)	566.32 (1325.69 to 63.65)	569.48 (1339.73 to 64.65)	0.01 (-0.02 to 0.03)
Sweden	12769.86 (30431.59 to 1690.17)	15604.1 (36201.8 to 2252.28)	511.3 (1227.13 to 63.76)	521.98 (1232.76 to 66.15)	0.07 (0.04 to 0.1)
Switzerland	23813.37 (55763.51 to 3347.87)	27877.27 (64548.43 to 4633.07)	590.86 (1344.31 to 98.73)	582.49 (1338.78 to 98.85)	-0.05 (-0.06 to -0.04)
Syrian Arab Republic	33146.11 (77643.22 to 4371.51)	39569.36 (91748.66 to 5473.6)	433.06 (1011.85 to 59.09)	472.59 (1111.34 to 59.26)	0.28 (0.23 to 0.33)
Taiwan (Province of China)	7628.29 (17997.32 to 1122.91)	16530.91 (38554.15 to 2583.62)	477.69 (1104.27 to 79.54)	477.15 (1103.28 to 78.67)	0 (-0.01 to 0.02)
Tajikistan	130512.68 (307768.11 to 12408.33)	146670.99 (341638.08 to 16694.06)	632.77 (1482.43 to 64.09)	635.17 (1498.05 to 65.01)	0.02 (0.01 to 0.02)
Thailand	1536.68 (3594.16 to 151.64)	2768.76 (6510.79 to 268.56)	602.21 (1399.18 to 65.52)	607.67 (1419.58 to 64.88)	0.03 (0 to 0.05)
The former Yugoslav Republic of Macedonia	5866.7 (13929.89 to 636.25)	15582.45 (37391.94 to 1857.63)	575.53 (1338.91 to 73.13)	579.1 (1368.57 to 75.86)	0.02 (0.01 to 0.03)
Timor-Leste	2.58 (6.08 to 0.28)	2.61 (6.1 to 0.31)	555.28 (1290.76 to 65.36)	553.4 (1290.45 to 65.79)	-0.01 (-0.01 to -0.01)
Togo	166.22 (393.18 to 16.8)	183.52 (433.05 to 20.64)	557.31 (1303.87 to 64.09)	554.55 (1297.77 to 65.67)	-0.02 (-0.03 to 0)
Tokelau	2041.23 (4837.41 to 242.94)	2360.65 (5449.29 to 335.3)	490.7 (1150.98 to 63.51)	488.79 (1140.22 to 63.41)	-0.01 (-0.01 to -0.01)
Tonga	16732.56 (38912.7 to 2544.22)	24038.01 (54733.94 to 4180.19)	591.41 (1351.37 to 99.94)	587.27 (1349.61 to 96.99)	-0.02 (-0.03 to -0.01)
Trinidad and Tobago	109688.89 (248103.55 to 18186.51)	164448.94 (368007.81 to 31311.78)	544.25 (1214.55 to 98.37)	542.51 (1222.39 to 98.68)	0.02 (-0.12 to 0.15)
Tunisia	5456.08 (12814.63 to 782.99)	9069.8 (20878.01 to 1466.68)	476.12 (1097.41 to 76.86)	477.67 (1096.72 to 78.49)	0.01 (0.01 to 0.01)
Turkey	15.49 (36.28 to 1.68)	24.91 (58.71 to 2.88)	555.06 (1291.09 to 63.9)	554.49 (1302.13 to 66.16)	0 (-0.01 to 0.02)
Turkmenistan	16448.43 (38149.55 to 2872.08)	44679.31 (105681.12 to 7508.56)	348.33 (787.3 to 68.54)	352.63 (813.81 to 67.81)	0.05 (0.03 to 0.07)
Tuvalu	82614.18 (178911.95 to 20858.97)	69255.83 (149292.36 to 18243.52)	467.33 (1021.57 to 113.63)	466.82 (1030 to 111.78)	0 (-0.02 to 0.02)
Uganda	5860.98 (13261.06 to 1036.97)	37128.4 (80994.21 to 7782.36)	589.75 (1347.58 to 98.84)	590.01 (1352.94 to 99.22)	0 (-0.01 to 0.02)
Ukraine	108003.83 (249584.59 to 14249.33)	123401.31 (285177.34 to 16809.56)	557.62 (1293.95 to 70.44)	563.77 (1316.77 to 69.84)	0.03 (0.02 to 0.04)
United Arab Emirates	23172.3 (53108.68 to 4290.15)	60553.01 (139509.01 to 11277.15)	327.41 (735.07 to 67.65)	344.03 (776.9 to 69.54)	0.17 (0.13 to 0.21)
United Kingdom of Great Britain and Northern Ireland	478678.39 (1079072.85 to 76202.76)	122.83 (282.02 to 18.14)	537.73 (1215.84 to 85.05)	524.2 (1188.53 to 84.32)	-0.09 (-0.15 to -0.03)
United Republic of Tanzania	176.89 (412.88 to 22.25)	572713.44 (1286923.37 to 98471.94)	491.13 (1144.86 to 61.85)	489.8 (1145.24 to 62.48)	0 (-0.01 to 0)
United States of America	4157.28 (9586.15 to 800.75)	4596.83 (10564.48 to 922.21)	407.52 (939.68 to 78.36)	406.74 (941.44 to 78.32)	0 (-0.01 to 0)
United States Virgin Islands	30647.63 (71122.86 to 4521.2)	57737.47 (132797.92 to 9313.72)	476.71 (1089.5 to 78.76)	478.62 (1100.99 to 77.26)	0.01 (0 to 0.02)
Uruguay	258.58 (614.69 to 27.32)	574.42 (1351.7 to 63.3)	551.33 (1295.62 to 64.66)	553.06 (1292.37 to 64.95)	0.01 (-0.01 to 0.04)
Uzbekistan	27960.6 (65738.06 to 3536.93)	39505.34 (90279.8 to 5800.88)	434.23 (1007.5 to 62.47)	447.12 (1028.92 to 61.47)	0.1 (0.07 to 0.12)
Vanuatu	127537.23 (303756.96 to 12191.5)	226196.15 (529188.78 to 24594.4)	612.58 (1446.69 to 65.8)	616.06 (1446.18 to 64.65)	0.02 (0.01 to 0.03)
Yemen	23258.99 (54410.23 to 3260.26)	67167.03 (156276.82 to 10240.88)	587.12 (1332.87 to 98.56)	586.76 (1335.87 to 100.88)	0 (-0.02 to 0.01)
Zambia	9024.73 (21045.56 to 1589.86)	25116.82 (58033.68 to 4558.96)	404.62 (921.97 to 80.82)	407.68 (924.39 to 82.31)	0 (-0.06 to 0.07)
Zimbabwe	14447.9 (33338.47 to 1910.96)	23615.59 (54180.35 to 3292.53)	488.44 (1104.47 to 74.94)	487.24 (1102.1 to 74.92)	-0.01 (-0.02 to 0.01)

## Sheet: TS6
Decomposition analysis of migraine indicators from 1990 to 2021
location	sex	cause	measure	Overll difference	Aging	Population	Epidemiological change	percent change of Aging(%)	percent change of Population(%)	percent change of Epidemiological change(%)
Global	Male	Migraine	DALYs (Disability-Adjusted Life Years)	5.31868e+06	139265	4.72759e+06	451828	1.49184	50.6432	4.8401
Global	Male	Migraine	Prevalence	1.3922e+08	2.11343e+06	1.24534e+08	1.25729e+07	0.858134	50.5656	5.10509
Global	Male	Migraine	Incidence	9.25381e+06	-1.34522e+06	9.72439e+06	874643	-6.76713	48.9184	4.39988
High SDI	Male	Migraine	DALYs (Disability-Adjusted Life Years)	325636	5445.97	281785	38405	0.341746	17.6826	2.41
High SDI	Male	Migraine	Prevalence	8.2239e+06	-221384	7.38113e+06	1.06415e+06	-0.528553	17.6224	2.54066
High SDI	Male	Migraine	Incidence	375891	-229268	513256	91903.3	-7.63837	17.0998	3.06188
High-middle SDI	Male	Migraine	DALYs (Disability-Adjusted Life Years)	507504	58366.4	377046	72091.5	3.20697	20.717	3.9611
High-middle SDI	Male	Migraine	Prevalence	1.26449e+07	915483	9.65058e+06	2.07886e+06	1.95816	20.642	4.44655
High-middle SDI	Male	Migraine	Incidence	532879	-334724	708418	159186	-9.26806	19.6151	4.40764
Middle SDI	Male	Migraine	DALYs (Disability-Adjusted Life Years)	1.71526e+06	68877.1	1.38385e+06	262530	2.24675	45.1408	8.56365
Middle SDI	Male	Migraine	Prevalence	4.4665e+07	1.14179e+06	3.629e+07	7.23323e+06	1.41792	45.0664	8.98253
Middle SDI	Male	Migraine	Incidence	2.59839e+06	-681441	2.83403e+06	445800	-10.2451	42.6081	6.70237
Low-middle SDI	Male	Migraine	DALYs (Disability-Adjusted Life Years)	1.73242e+06	53855.9	1.67135e+06	7209.56	2.54805	79.0755	0.341101
Low-middle SDI	Male	Migraine	Prevalence	4.61102e+07	1.30758e+06	4.50076e+07	-204963	2.28949	78.8055	-0.358876
Low-middle SDI	Male	Migraine	Incidence	3.36945e+06	-301103	3.70751e+06	-36956.1	-6.19666	76.3001	-0.760554
Low SDI	Male	Migraine	DALYs (Disability-Adjusted Life Years)	1.03518e+06	8261.74	1.02317e+06	3746.17	1.12619	139.472	0.510654
Low SDI	Male	Migraine	Prevalence	2.75077e+07	214963	2.74695e+07	-176728	1.08683	138.884	-0.893524
Low SDI	Male	Migraine	Incidence	2.37332e+06	-13784.4	2.4004e+06	-13297.4	-0.793433	138.168	-0.765402
